# Supplementary material for: Structural systematics and conformational analyses of a 3 × 3 isomer grid of nine N-(tolyl)pyridinecarboxamides and three chlorinated relatives
Source: Royal Society of Chemistry journal article supplement (doi:10.1039/c1ce05169e), 2011-01-01
Supplement: c1ce05169e.pdf [file c1ce05169e.pdf]

**Structural systematics and conformational analyses of a 3×3 isomer grid of nine *N*-(tolyl)pyridinecarboxamides and three chlorinated relatives.**

**Pavle Mocolac and John F. Gallagher\***

*Targeted Therapeutics and Theranostics (T<sup>3</sup>) Programme*

*School of Chemical Sciences, Dublin City University, Dublin 9, Ireland*

**Electronic Supplementary Information**

Table of Contents

|                                                                                                            |                    |
|------------------------------------------------------------------------------------------------------------|--------------------|
| 1. <a href="#">Detailed description of synthetic procedures</a>                                            | <a href="#">3</a>  |
| 2. <a href="#"><sup>1</sup>H NMR data and spectra</a>                                                      | <a href="#">4</a>  |
| 2.1. <a href="#">NppM</a>                                                                                  | <a href="#">4</a>  |
| 2.2. <a href="#">NpmM</a>                                                                                  | <a href="#">5</a>  |
| 2.3. <a href="#">NpoM</a>                                                                                  | <a href="#">6</a>  |
| 2.4. <a href="#">NmpM</a>                                                                                  | <a href="#">7</a>  |
| 2.5. <a href="#">NmmM</a>                                                                                  | <a href="#">8</a>  |
| 2.6. <a href="#">NmoM</a>                                                                                  | <a href="#">9</a>  |
| 2.7. <a href="#">NopM</a>                                                                                  | <a href="#">10</a> |
| 2.8. <a href="#">NomM</a>                                                                                  | <a href="#">11</a> |
| 2.9. <a href="#">NooM</a>                                                                                  | <a href="#">12</a> |
| 2.10. <a href="#">5-Cl-NopM</a>                                                                            | <a href="#">13</a> |
| 2.11. <a href="#">5-Cl-NomM</a>                                                                            | <a href="#">14</a> |
| 2.12. <a href="#">5-Cl-NooM</a>                                                                            | <a href="#">15</a> |
| 3. <a href="#">IR data and spectra (ATR)</a>                                                               | <a href="#">16</a> |
| 3.1. <a href="#">NppM</a>                                                                                  | <a href="#">16</a> |
| 3.2. <a href="#">NpmM</a>                                                                                  | <a href="#">17</a> |
| 3.3. <a href="#">NpoM</a>                                                                                  | <a href="#">18</a> |
| 3.4. <a href="#">NmpM</a>                                                                                  | <a href="#">19</a> |
| 3.5. <a href="#">NmmM</a>                                                                                  | <a href="#">20</a> |
| 3.6. <a href="#">NmoM</a>                                                                                  | <a href="#">21</a> |
| 3.7. <a href="#">NopM</a>                                                                                  | <a href="#">22</a> |
| 3.8. <a href="#">NomM</a>                                                                                  | <a href="#">23</a> |
| 3.9. <a href="#">NooM</a>                                                                                  | <a href="#">24</a> |
| 3.10. <a href="#">5-Cl-NopM</a>                                                                            | <a href="#">25</a> |
| 3.11. <a href="#">5-Cl-NopM</a>                                                                            | <a href="#">26</a> |
| 3.12. <a href="#">5-Cl-NopM</a>                                                                            | <a href="#">27</a> |
| 4. <a href="#">Crystallographic details</a>                                                                | <a href="#">28</a> |
| 4.1. <a href="#">Table 2. Experimental details for the nine NxxM isomers</a>                               | <a href="#">28</a> |
| 4.2. <a href="#">Table 3. Experimental details for the three Cl-5-NxxM isomers and NmpFM</a>               | <a href="#">30</a> |
| 4.3. <a href="#">Table 4. Selected hydrogen-bond parameters for the nine NxxM isomers</a>                  | <a href="#">31</a> |
| 4.4. <a href="#">Table 5. Selected hydrogen-bond parameters for three Cl-5-NxxM isomers and NmpFM</a>      | <a href="#">33</a> |
| 5. <a href="#">Ab initio calculation information</a>                                                       | <a href="#">34</a> |
| 5.1. <a href="#">Energy information</a>                                                                    | <a href="#">34</a> |
| 5.1.1. <a href="#">Table 3. Optimisations in gas phase</a>                                                 | <a href="#">34</a> |
| 5.1.2. <a href="#">Table 4. Optimisations in CH<sub>2</sub>Cl<sub>2</sub></a>                              | <a href="#">34</a> |
| 5.1.3. <a href="#">Table 5. Optimisations in H<sub>2</sub>O</a>                                            | <a href="#">34</a> |
| 5.1.4. <a href="#">Table 6. Comparison of energies in different media</a>                                  | <a href="#">35</a> |
| 5.2. <a href="#">PES scans of the nine NxxM conformers (rotamers), optimised in gas phase</a>              | <a href="#">36</a> |
| 5.3. <a href="#">PES scans of the nine NxxM conformers (rotamers), optimised in gas phase and solvents</a> | <a href="#">38</a> |

### 1. Detailed description of synthetic procedures

As acyl chlorides are very reactive, the reactions were performed in anhydrous conditions in CH<sub>2</sub>Cl<sub>2</sub> (under N<sub>2</sub>), initially at 5°C and then at room temperature. A by-product is HCl, and triethylamine (Et<sub>3</sub>N) was employed to drive the reaction equilibrium towards the NxxM product. The pyridinoyl chlorides technically were used in the form of hydrochlorides so an additional mole of Et<sub>3</sub>N was used to enhance their solubility in CH<sub>2</sub>Cl<sub>2</sub> so that in total, two molar equivalents of triethylamine (Et<sub>3</sub>N) were added per reaction.

Condensation reactions were performed with the 4-, 3- or 2-toluidines (1 ml, 10.41 mmol) added to a 250 ml flask placed on an ice bath and with subsequent stirring. Then, 30 ml of CH<sub>2</sub>Cl<sub>2</sub> was added to the flask followed by addition of Et<sub>3</sub>N (1.5 ml, 10.76 mmol). Finally, the 4-, 3- or 2-pyridinoyl chlorides (2 g, 11.23 mmol) were added in portions directly into this solution mixture. Another 30 ml of CH<sub>2</sub>Cl<sub>2</sub> and 1.5 ml of NEt<sub>3</sub> was added to accelerate the dissolution of any solids and the reaction mixture was allowed to warm to room temperature and stirred overnight.

Organic washing and work-up was as standard: the organic reaction phase was washed with 20 ml of KHCO<sub>3</sub> (0.1 M) solution *ca.* 3-7 times and during purification, glassware was warmed to *ca.* 35°C. Then, 1.5 g of anhydrous MgSO<sub>4</sub> was added to the organic solutions for 20 minutes. The flask contents were filtered through a Büchner funnel (under vacuum) to remove MgSO<sub>4</sub>. The filtrate was evaporated under vacuum and the crystallization induced giving the desired product in modest to good yields.

#### Separation and purification of NoxM compounds

The NoxM compounds were successfully separated from 5-Cl-NoxM compounds by column chromatography using silica gel as stationary phase and mixture of chloroform, ethyl acetate and cyclohexane (4:2:1).

**Fig. 1.** Schematic diagram of the NxxM synthesis.

**Table 1** Obtained amounts, yields and melting point ranges of the NxxM isomers with 5-Cl-NoxM.

| NxxM      | m/g   | yield/% | m.p./°C     |
|-----------|-------|---------|-------------|
| NppM      | 1.578 | 78.9    | 161.0-162.5 |
| NmpM      | 1.847 | 92.3    | 140.2-142.9 |
| NpoM      | 1.747 | 87.3    | 123.9-125.9 |
| NmpM      | 1.863 | 93.1    | 147.6-148.3 |
| NmmM      | 1.530 | 76.5    | 113.0-114.7 |
| NmoM      | 1.390 | 69.5    | 106.1-107.0 |
| NopM      | 1.340 | 67.0    | 104.7-105.2 |
| NomM      | 0.876 | 43.8    | 49.2-50.5   |
| NooM      | 1.134 | 56.7    | 64.1-64.9   |
| 5-Cl-NopM | 0.250 | 12.5    | 125.5-129.5 |
| 5-Cl-NomM | 0.224 | 11.2    | 70.2-73.9   |
| 5-Cl-NooM | 0.332 | 16.6    | 128.3-128.6 |

## 2. <sup>1</sup>H NMR data and spectra

### 2.1 NppM

<sup>1</sup>H NMR (CDCl<sub>3</sub>) δ 2.37 (3H, s), 7.21 (2H, d, <sup>3</sup>J = 8), 7.54 (2H, d, <sup>3</sup>J = 8), 7.73 (2H, dd, <sup>3</sup>J = 4.5, <sup>4</sup>J = 1.5), 8.00 (1H, br s), 8.80 (2H, dd, <sup>3</sup>J = 4.5, <sup>4</sup>J = 1.5); <sup>1</sup>H NMR (DMSO-*d*<sup>6</sup>) δ 2.29 (3H, s), 7.19 (2H, d, <sup>3</sup>J = 8), 7.66 (2H, d, <sup>3</sup>J = 8.4), 7.86 (2H, dd, <sup>3</sup>J = 4.5, <sup>4</sup>J = 1.6), 8.79 (2H, dd, <sup>3</sup>J = 4.5, <sup>4</sup>J = 1.6), 10.44 (1H, br s); <sup>13</sup>C NMR (DMSO-*d*<sup>6</sup>) δ 20.49, 120.43, 121.52, 129.09, 133.20, 136.03, 141.96, 150.21, 163.70.

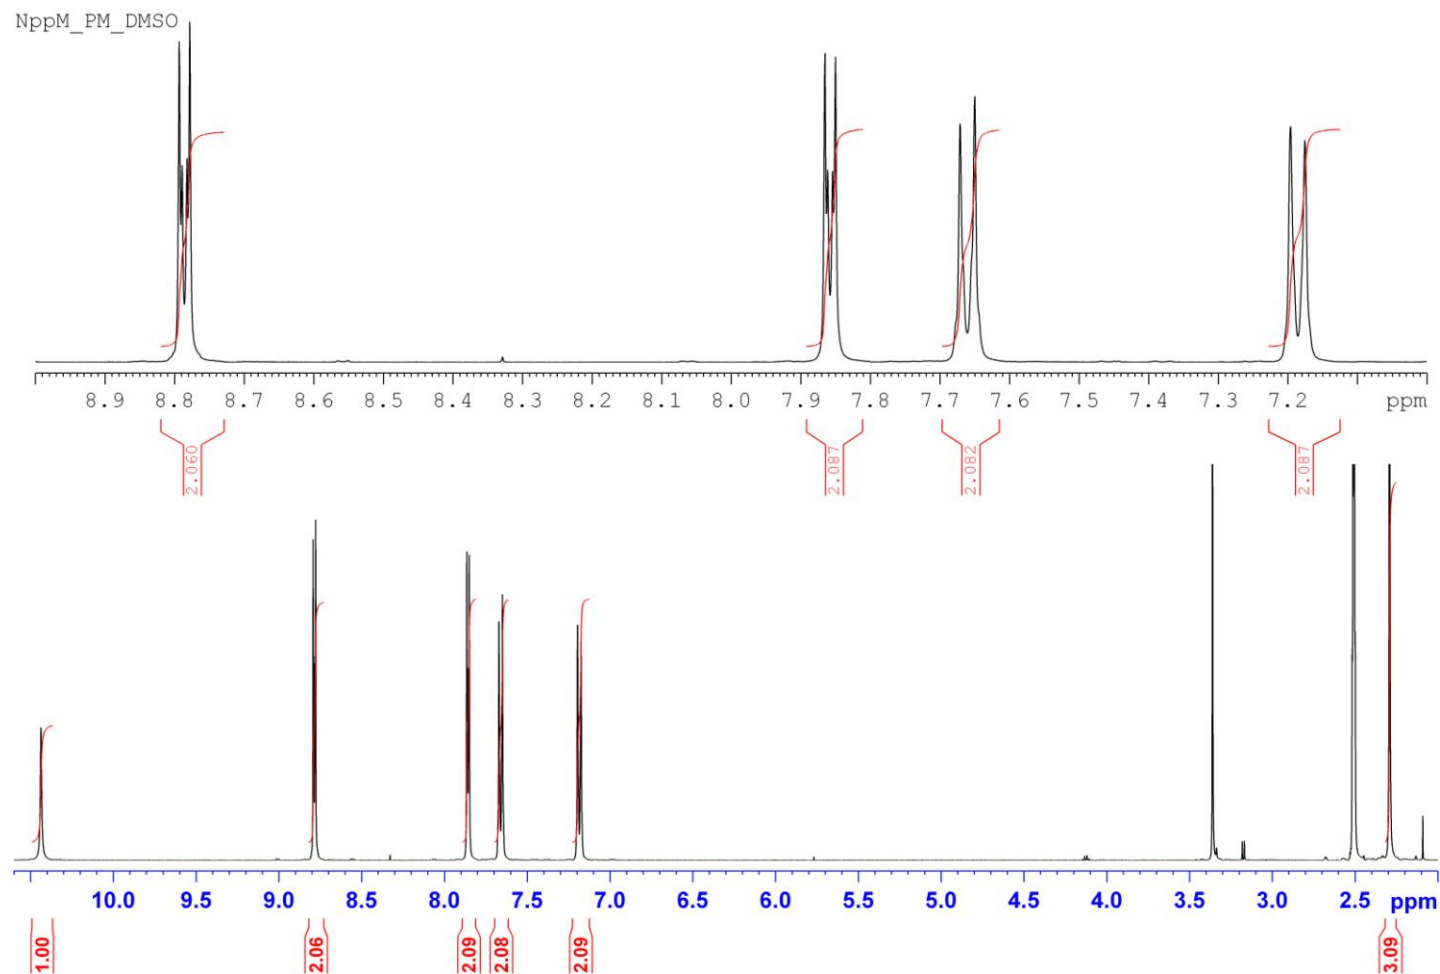

## 2.2 NpmM

$^1\text{H NMR}$  ( $\text{CDCl}_3$ )  $\delta$  2.31 (3H, s), 6.94 (1H, d,  $^3J = 8$ ), 7.20 (1H, t,  $^3J = 8$ ), 7.35 (1H, d,  $^3J = 8$ ), 7.44 (1H, s), 7.65 (2H, dd,  $^3J = 4.5$ ,  $^4J = 1.5$ ), 7.96 (1H, br s), 8.72 (2H, dd,  $^3J = 4.5$ ,  $^4J = 1.5$ );  $^1\text{H NMR}$  ( $\text{DMSO-}d^6$ )  $\delta$  2.32 (3H, s), 6.97 (1H, d,  $^3J = 7.6$ ), 7.26 (1H, t,  $^3J = 7.8$ ), 7.57 (1H, d,  $^3J = 8$ ), 7.62 (1H, s), 7.86 (2H, dd,  $^3J = 4.3$ ,  $^4J = 1.7$ ), 8.79 (2H, dd,  $^3J = 4.3$ ,  $^4J = 1.7$ ), 10.43 (1H, br s);  $^{13}\text{C NMR}$  ( $\text{DMSO-}d^6$ )  $\delta$  21.62, 118.06, 121.40, 121.98, 125.32, 128.99, 138.34, 138.93, 142.39, 150.69, 164.32.

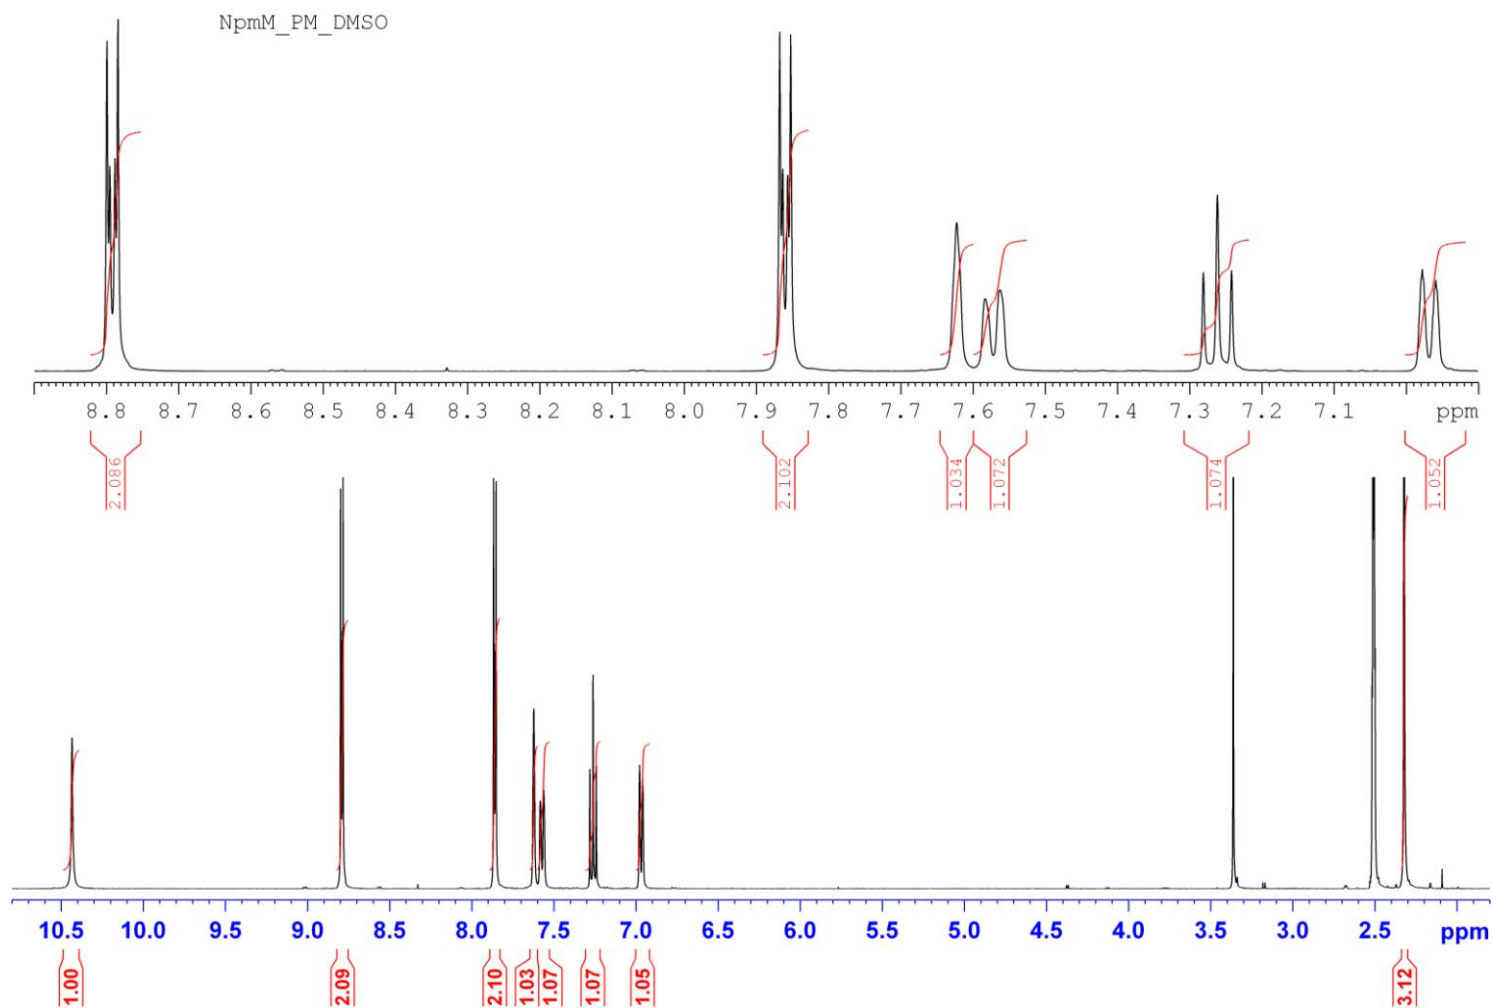

### 2.3 NpoM

$^1\text{H NMR}$  ( $\text{CDCl}_3$ )  $\delta$  2.35 (3H, s), 7.19 (1H, td,  $^3J = 7.5$ ,  $^4J = 1$ ), 7.28 (2H, m), 7.76 (2H, d,  $^3J = 4.2$ ), 7.87 (1H, d,  $^3J = 8$ ), 7.90 (1H, br s), 8.8 (2H, d,  $^3J = 4.8$ );  $^1\text{H NMR}$  ( $\text{DMSO-}d^6$ )  $\delta$  2.25 (3H, s), 7.21 (1H, td,  $^3J = 7.3$ ,  $^4J = 1.5$ ), 7.25 (1H, td,  $^3J = 7.6$ ,  $^4J = 1.7$ ), 7.30 (1H, dd,  $^3J = 7$ ,  $^4J = 1.5$ ), 7.36 (1H, d,  $^3J = 7.5$ ), 7.89 (2H, dd,  $^3J = 4.6$ ,  $^4J = 1.4$ ), 8.80 (2H, dd,  $^3J = 4.5$ ,  $^4J = 1.5$ ), 10.19 (1H, br s);  $^{13}\text{C NMR}$  ( $\text{DMSO-}d^6$ )  $\delta$  17.82, 121.55, 126.10, 126.40, 126.57, 130.40, 133.76, 135.70, 141.46, 150.31, 163.76.

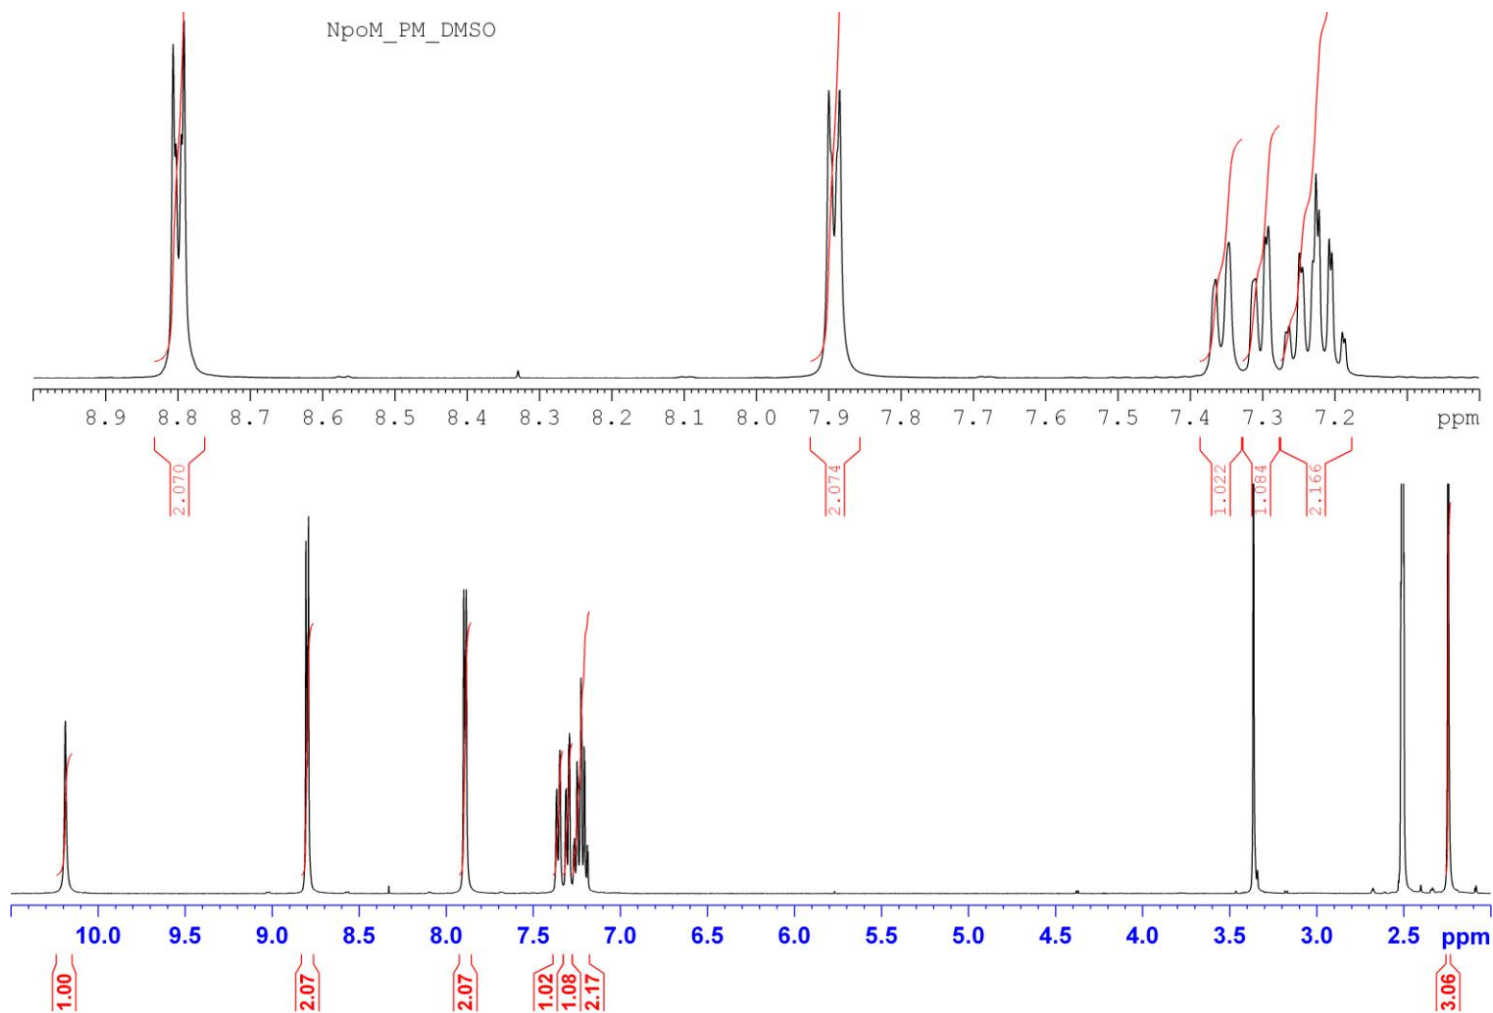

#### 2.4. NmpM

$^1\text{H NMR}$  ( $\text{CDCl}_3$ )  $\delta$  2.36 (3H, s), 7.19 (2H, d,  $^3J = 8$ ), 7.44 (1H, dd,  $^3J = 8$ ,  $^4J = 5$ ), 7.55 (2H, d,  $^3J = 8$ ), 8.22 (1H, br s), 8.23 (1H, d,  $^3J = 7.5$ ), 8.75 (1H, dd,  $^3J = 4.5$ ,  $^4J = 1$ ), 9.12 (1H, s);  $^1\text{H NMR}$  ( $\text{DMSO-}d^6$ )  $\delta$  2.29 (3H, s), 7.18 (2H, d,  $^3J = 8.3$ ), 7.57 (1H, ddd,  $^3J = 8$ ,  $^4J = 4.8$ ,  $^5J = 0.8$ ), 7.66 (2H, d,  $^3J = 8.4$ ), 8.29 (1H, dt,  $^3J = 8$ ,  $^4J = 2$ ), 8.76 (1H, dd,  $^3J = 4.8$ ,  $^4J = 1.6$ ), 9.10 (1H, d,  $^3J = 2$ ), 10.38 (1H, br s);  $^{13}\text{C NMR}$  ( $\text{DMSO-}d^6$ )  $\delta$  20.49, 120.33, 123.46, 129.06, 130.61, 132.94, 135.36, 136.27, 148.60, 151.99, 163.79.

NmpM\_PM\_DMSO

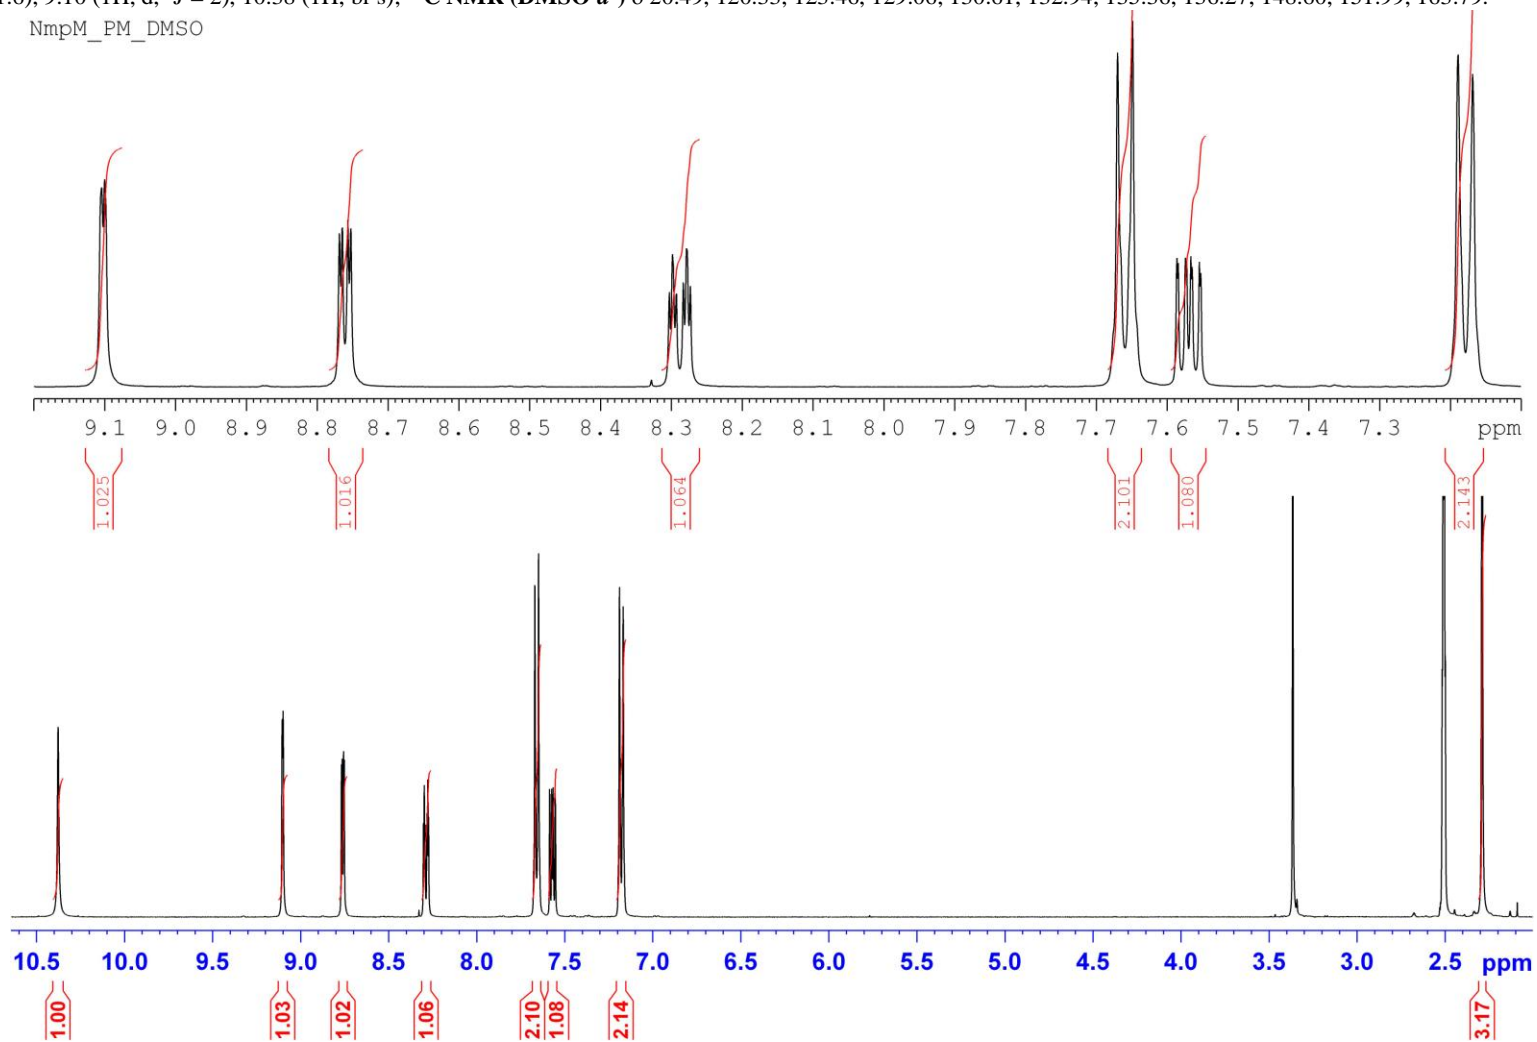

### 2.5. NmmM

$^1\text{H NMR}$  ( $\text{CDCl}_3$ )  $\delta$  2.38 (3H, s), 7.01 (1H, d,  $^3J = 7.5$ ), 7.27 (1H, t,  $^3J = 7.7$ ), 7.44 (2H, d,  $^3J = 7.2$ ), 7.53 (1H, s), 8.23 (1H, d,  $^3J = 7.5$ ), 8.26, (1H, br s), 8.75 (1H, d,  $^3J = 4.2$ ), 9.11 (1H, s);  $^1\text{H NMR}$  ( $\text{DMSO-}d^6$ )  $\delta$  2.32 (3H, s), 6.95 (1H, d,  $^3J = 7.5$ ), 7.25 (1H, t,  $^3J = 7.8$ ), 7.57 (1H, dd,  $^3J = 8$ ,  $^4J = 0.5$ ), 7.57 (1H, ddd,  $^3J = 8$ ,  $^4J = 4.8$ ,  $^5J = 0.5$ ), 7.62 (1H, s), 8.29 (1H, dt,  $^3J = 8$ ,  $^4J = 2$ ), 8.76 (1H, dd,  $^3J = 4.8$ ,  $^4J = 1.6$ ), 9.10 (1H, d,  $^3J = 2$ ), 10.38 (1H, br s);  $^{13}\text{C NMR}$  ( $\text{DMSO-}d^6$ )  $\delta$  21.61, 117.93, 121.27, 123.90, 125.07, 128.94, 131.02, 135.82, 138.26, 139.14, 149.05, 152.47, 164.37.

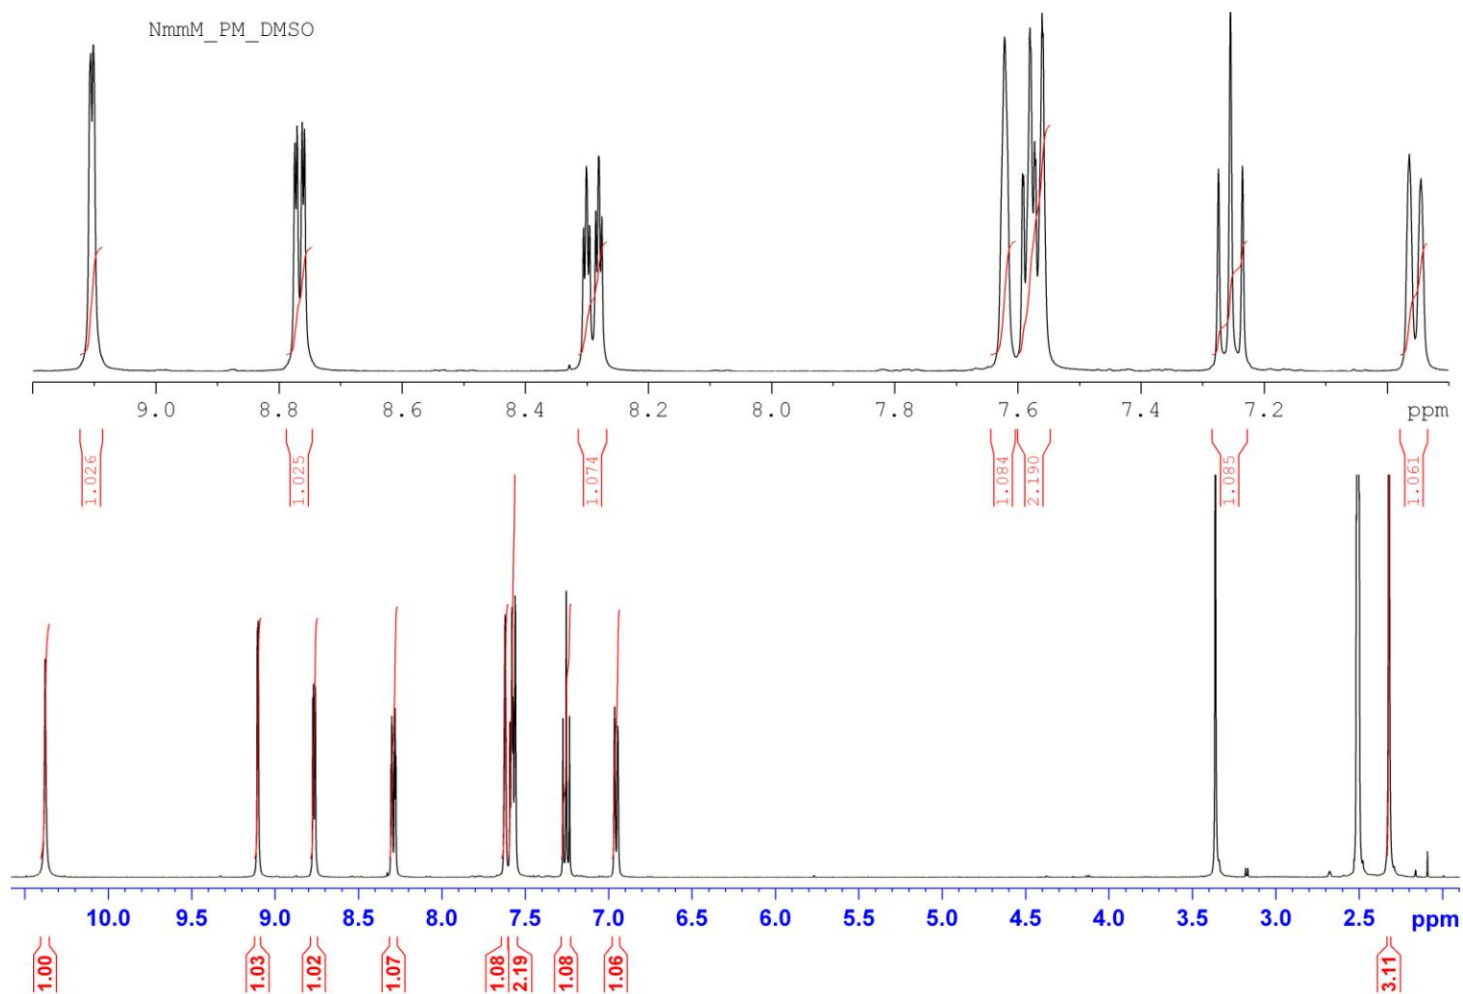



### 2.6. NmoM

$^1\text{H NMR}$  ( $\text{CDCl}_3$ ):  $\delta$  2.27 (3H, s) 7.09 (1H, td,  $^3J = 8$ ,  $^4J = 1$ ), 7.19 (2H, m), 7.39 (1H, dd,  $^3J = 8.5$ ,  $^4J = 4.8$ ), 7.78 (1H, d,  $^3J = 6.3$ ), 7.81 (1H, br s), 8.18 (1H, d,  $^3J = 6.8$ ), 8.71 (1H, d,  $^3J = 4.2$ ), 9.07 (1H, s);  $^1\text{H NMR}$  ( $\text{DMSO-}d^6$ ):  $\delta$  2.26 (3H, s), 7.20 (1H, td,  $^3J = 7.3$ ,  $^4J = 1.6$ ), 7.24 (1H, td,  $^3J = 7.6$ ,  $^4J = 1.5$ ), 7.30 (1H, dd,  $^3J = 7$ ,  $^4J = 1.3$ ), 7.37 (1H, d,  $^3J = 7.8$ ), 7.58 (1H, ddd,  $^3J = 4$ ,  $^4J = 4.8$ ,  $^5J = 0.7$ ), 8.32 (1H, dt,  $^3J = 8$ ,  $^4J = 1.8$ ), 8.78 (1H, dd,  $^3J = 4.8$ ,  $^4J = 1.6$ ), 9.15 (1H, d,  $^3J = 1.6$ ), 10.10 (1H, br s);  $^{13}\text{C NMR}$  ( $\text{DMSO-}d^6$ ):  $\delta$  17.88, 123.54, 126.05, 126.22, 126.54, 130.08, 130.37, 133.68, 135.40, 135.93, 148.67, 152.11, 163.84.

NmoM\_PM\_DMSO

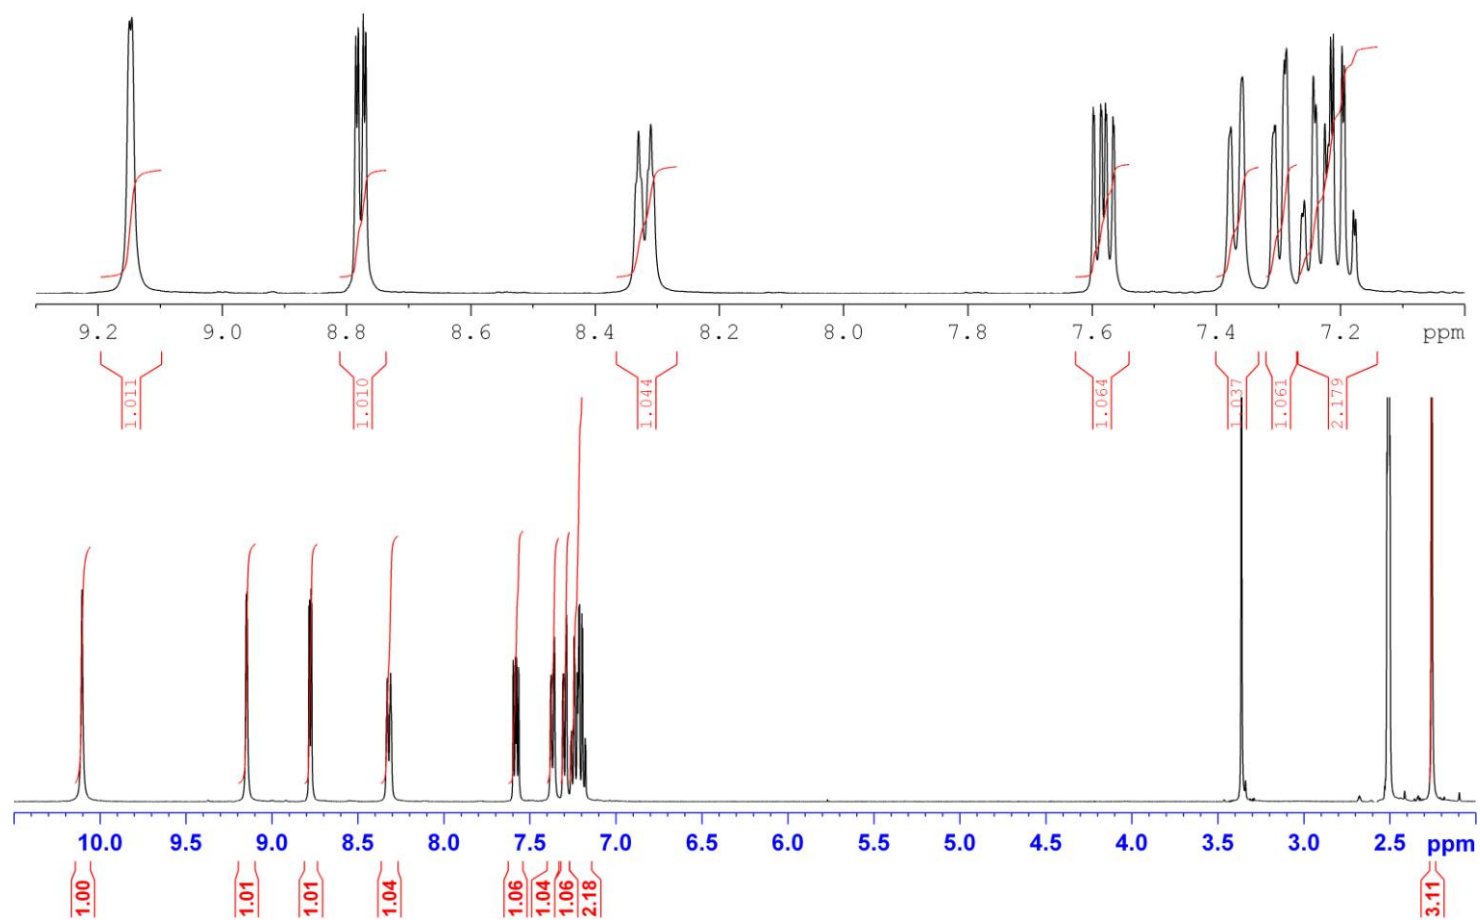

### 2.7. NopM

**<sup>1</sup>H NMR (CDCl<sub>3</sub>):** δ 2.27 (3H, s), 7.12 (2H, d, <sup>3</sup>J = 8), 7.40 (1H, ddd, <sup>3</sup>J = 7.5, <sup>4</sup>J = 4.8, <sup>5</sup>J = 1.2), 7.60 (2H, d, <sup>3</sup>J = 8.4), 7.83 (1H, td, <sup>3</sup>J = 7.7, <sup>4</sup>J = 1.7), 8.23 (1H, dt, <sup>3</sup>J = 7.8, <sup>4</sup>J = 1), 8.54 (1H, dq, <sup>3</sup>J = 4.8, <sup>4</sup>J = 0.8), 9.90 (1H, br s); **<sup>1</sup>H NMR (DMSO-*d*<sub>6</sub>):** δ 2.29 (3H, s), 7.17 (2H, d, <sup>3</sup>J = 8.4), 7.67 (1H, ddd, <sup>3</sup>J = 7.6, <sup>4</sup>J = 4.8, <sup>5</sup>J = 1.2), 7.80 (2H, d, <sup>3</sup>J = 8.4), 8.07 (1H, td, <sup>3</sup>J = 7.7, <sup>4</sup>J = 1.7), 8.16 (1H, dt, <sup>3</sup>J = 7.8, <sup>4</sup>J = 1), 8.74 (1H, dq, <sup>3</sup>J = 4.8, <sup>4</sup>J = 0.8), 10.56 (1H, br s); **<sup>13</sup>C NMR (DMSO-*d*<sub>6</sub>)** δ 20.49, 120.15, 122.27, 126.81, 129.05, 132.87, 135.80, 138.10, 148.38, 149.94, 162.21.

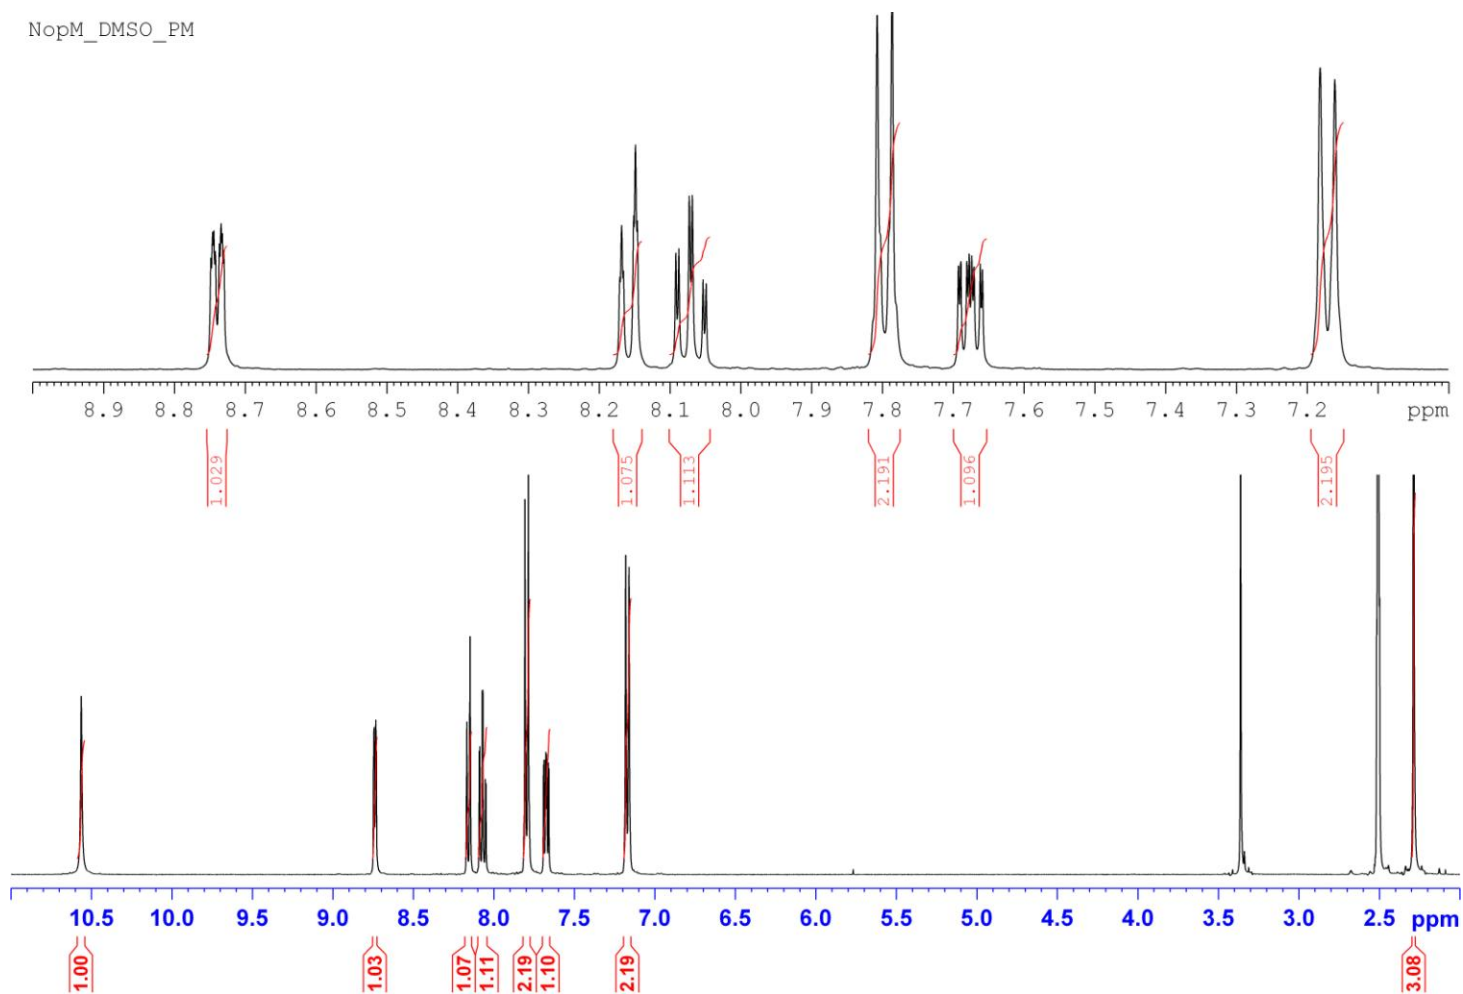

**2.8 NomM**

**<sup>1</sup>H NMR (CDCl<sub>3</sub>):** δ 2.31 (3H, s), 6.90 (1H, d, <sup>3</sup>J = 7.5), 7.2 (1H, t, <sup>3</sup>J = 7.8), 7.41 (1H, ddd, <sup>3</sup>J = 7.6, <sup>4</sup>J = 4.8, <sup>5</sup>J = 1.2), 7.50 (1H, d, <sup>3</sup>J = 8), 7.58 (1H, s), 7.84 (1H, td, <sup>3</sup>J = 7.7, <sup>4</sup>J = 1.7), 8.23 (1H, dt, <sup>3</sup>J = 7.8, <sup>4</sup>J = 1), 8.54 (1H, dq, <sup>3</sup>J = 4.7, <sup>4</sup>J = 0.8), 9.94 (1H, br s); **<sup>1</sup>H NMR (DMSO-*d*<sup>6</sup>):** δ: 2.32 (3H, s), 6.95 (1H, d, <sup>3</sup>J = 7.5), 7.25 (1H, t, <sup>3</sup>J = 7.7), 7.68 (1H, ddd, <sup>3</sup>J = 7.6, <sup>4</sup>J = 4.8, <sup>5</sup>J = 1.2), 7.69 (1H, d, <sup>3</sup>J = 8), 7.77 (1H, s), 8.07 (1H, td, <sup>3</sup>J = 7.7, <sup>4</sup>J = 1.7), 8.16 (1H, dt, <sup>3</sup>J = 7.8, <sup>4</sup>J = 1), 8.74 (1H, dq, <sup>3</sup>J = 4.7, <sup>4</sup>J = 0.8), 10.54 (1H, br s); **<sup>13</sup>C NMR (DMSO-*d*<sup>6</sup>):** δ 21.19, 117.34, 120.66, 122.28, 124.60, 126.88, 128.51, 137.86, 138.13, 138.18, 148.39, 149.86, 162.30.

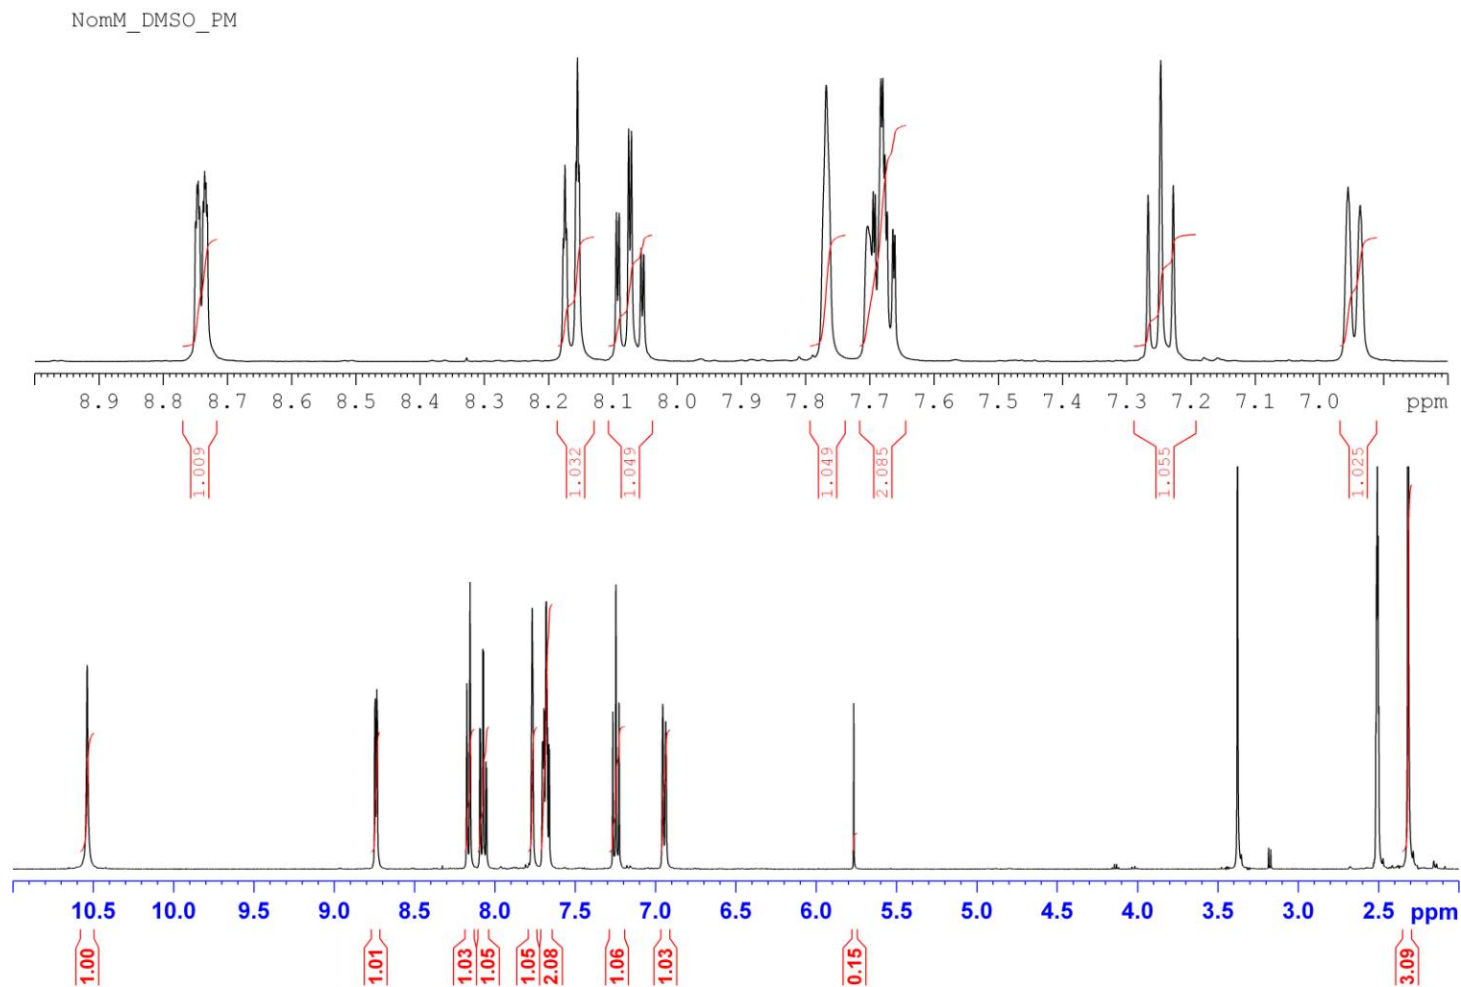

### 2.9 NooM

**<sup>1</sup>H NMR (CDCl<sub>3</sub>)** δ: 2.35 (3H, s), 7.02 (1H, td, <sup>3</sup>J = 7.4, <sup>4</sup>J = 1), 7.16 (1H, d, <sup>3</sup>J = 7.4), 7.21 (1H, t, <sup>3</sup>J = 7.8), 7.41 (1H, ddd, <sup>3</sup>J = 7.7, <sup>4</sup>J = 4.8, <sup>5</sup>J = 1.2), 7.84 (1H, td, <sup>3</sup>J = 7.7, <sup>4</sup>J = 1.7), 8.21 (1H, d, <sup>3</sup>J = 8), 8.24 (1H, dt, <sup>3</sup>J = 7.8, <sup>4</sup>J = 1), 8.56 (1H, dq, <sup>3</sup>J = 4.8, <sup>4</sup>J = 0.8), 10.03 (1H, br s); **<sup>1</sup>H NMR (DMSO-*d*<sub>6</sub>)**: δ 2.32 (3H, s), 7.13 (1H, td, <sup>3</sup>J = 7.4, <sup>4</sup>J = 1.2), 7.25 (1H, dt, <sup>3</sup>J = 7.7, <sup>4</sup>J = 1.1), 7.29 (1H, d, <sup>3</sup>J = 7.6), 7.70 (1H, ddd, <sup>3</sup>J = 7.6, <sup>4</sup>J = 4.8, <sup>5</sup>J = 1.2), 7.86 (1H, d, <sup>3</sup>J = 8), 8.09 (1H, td, <sup>3</sup>J = 7.7, <sup>4</sup>J = 1.7), 8.18 (1H, dt, <sup>3</sup>J = 7.8, <sup>4</sup>J = 1), 8.75 (1H, dq, <sup>3</sup>J = 4.8, <sup>4</sup>J = 0.8), 10.28 (1H, br s); **<sup>13</sup>C NMR (DMSO-*d*<sub>6</sub>)** δ 17.49, 122.15, 123.02, 124.97, 126.26, 127.05, 130.23, 130.32, 135.91, 138.23, 148.55, 149.59, 161.89.

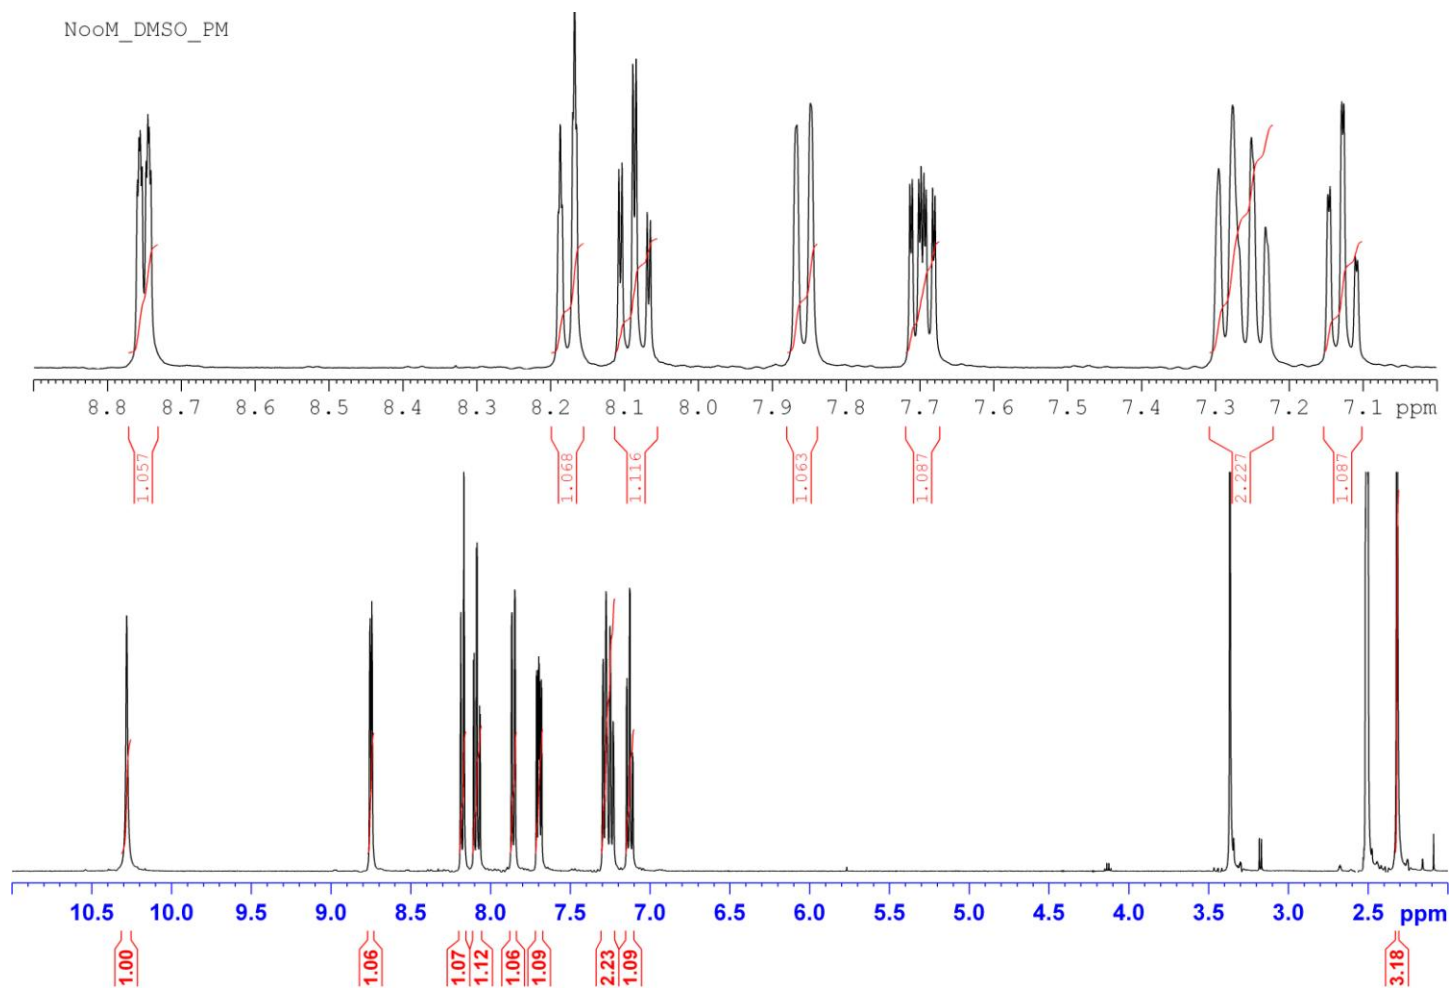

**2.10. 5-Cl-NopM**

$^1\text{H NMR}$  ( $\text{CDCl}_3$ )  $\delta$  2.27 (3H, s), 7.12 (2H, d,  $^3J = 8.3$ ), 7.40 (1H, dd,  $^3J = 5.2$ ,  $^4J = 2$ ), 7.57 (2H, d,  $^3J = 8.5$ ), 8.22 (1H, dd,  $^3J = 2$ ,  $^4J = 0.5$ ), 8.43 (1H, d,  $^3J = 5.3$ ), 9.79 (1H, br s);

$^1\text{H NMR}$  ( $\text{DMSO-}d_6$ )  $\delta$  2.29 (3H, s), 7.17 (2H, d,  $^3J = 8.3$ ), 7.78 (2H, d,  $^3J = 8.4$ ), 7.84 (1H, dd,  $^3J = 5.3$ ,  $^4J = 2$ ), 8.15 (1H, d,  $^3J = 2$ ), 8.72 (1H, d,  $^3J = 5.3$ ), 10.63 (1H, br s);  $^{13}\text{C NMR}$  ( $\text{DMSO-}d_6$ ):  $\delta$  20.49, 120.32, 122.37, 126.70, 129.06, 133.16, 135.60, 144.79, 149.96, 151.79, 161.10.

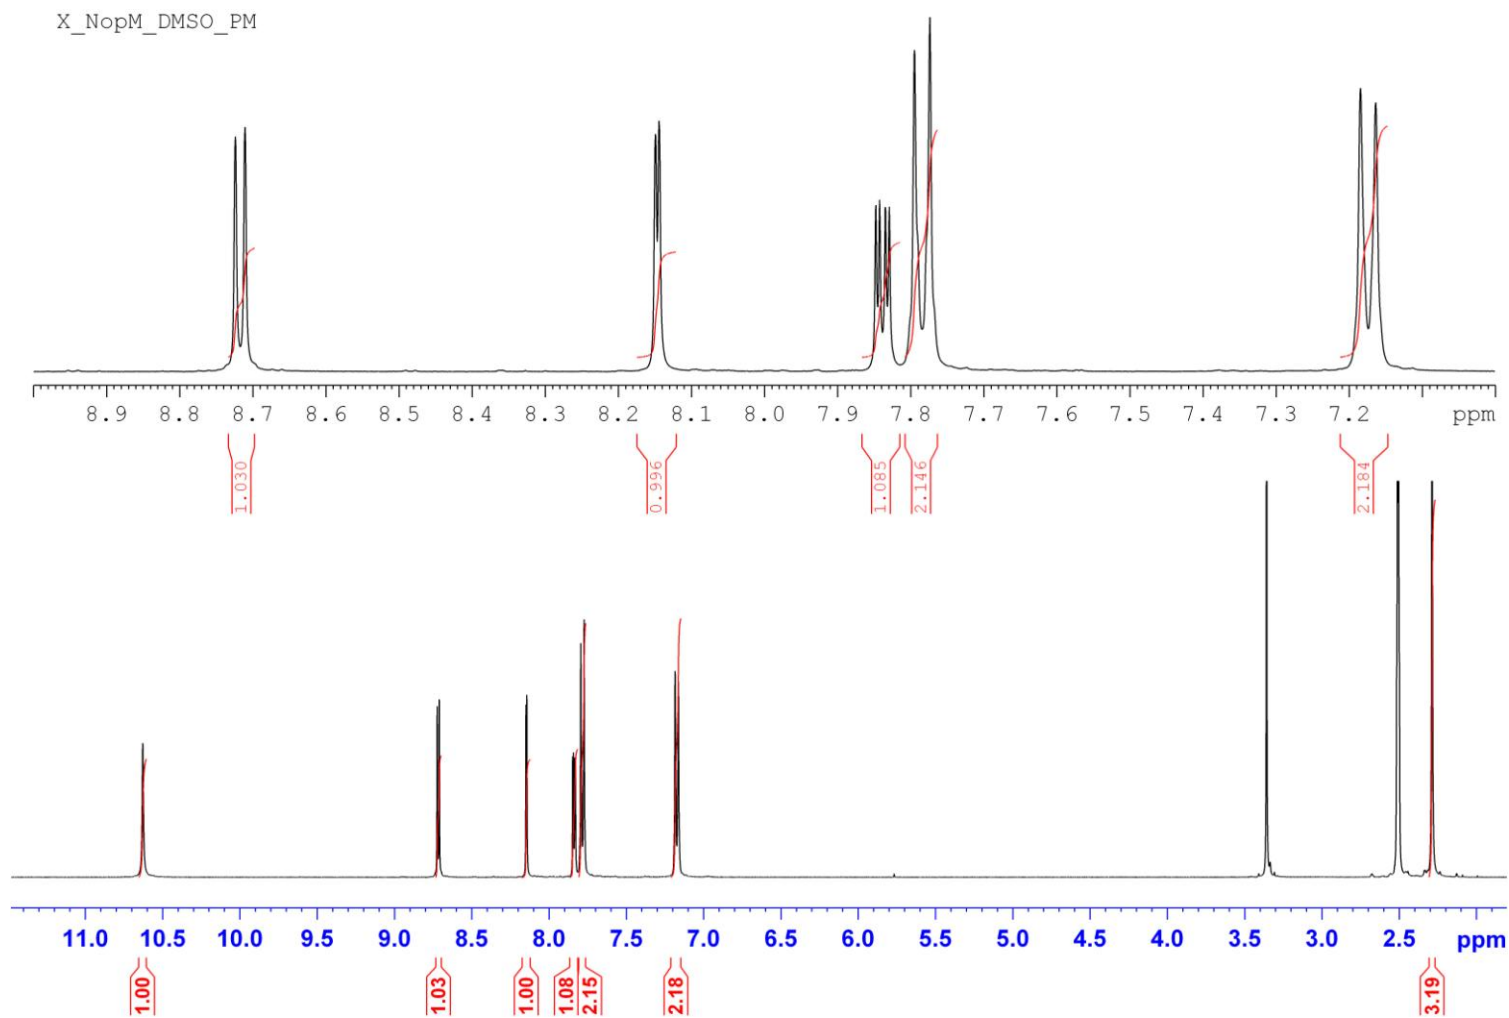

**2.11. 5-Cl-NomM**

$^1\text{H NMR}$  ( $\text{CDCl}_3$ )  $\delta$  2.31 (3H, s), 6.91 (1H, d,  $^3J = 7.6$ ), 7.20 (1H, t,  $^3J = 7.8$ ), 7.41 (1H, dd,  $^3J = 5.3$ ,  $^3J = 2$ ), 7.48 (1H, d,  $^3J = 8$ ), 7.54 (1H, s), 8.22 (1H, d,  $^3J = 2$ ), 8.43 (1H, dd,  $^3J = 5$ ,  $^4J = 0.5$ ), 9.80 (1H, br s);  $^1\text{H NMR}$  ( $\text{DMSO-}d_6$ )  $\delta$  2.31 (3H, s), 6.96 (1H, d,  $^3J = 7.6$ ), 7.25 (1H, t,  $^3J = 7.9$ ), 7.68 (1H, d,  $^3J = 8$ ), 7.75 (1H, s), 7.84 (1H, dd,  $^3J = 5.3$ ,  $^4J = 2$ ), 8.14 (1H, d,  $^3J = 2$ ), 8.71 (1H, d,  $^3J = 5.2$ ), 10.59 (1H, br s);  $^{13}\text{C NMR}$  ( $\text{DMSO-}d_6$ )  $\delta$  21.18, 117.53, 120.84, 122.38, 124.85, 126.76, 128.51, 137.88, 137.97, 144.81, 149.97, 151.71, 161.19.

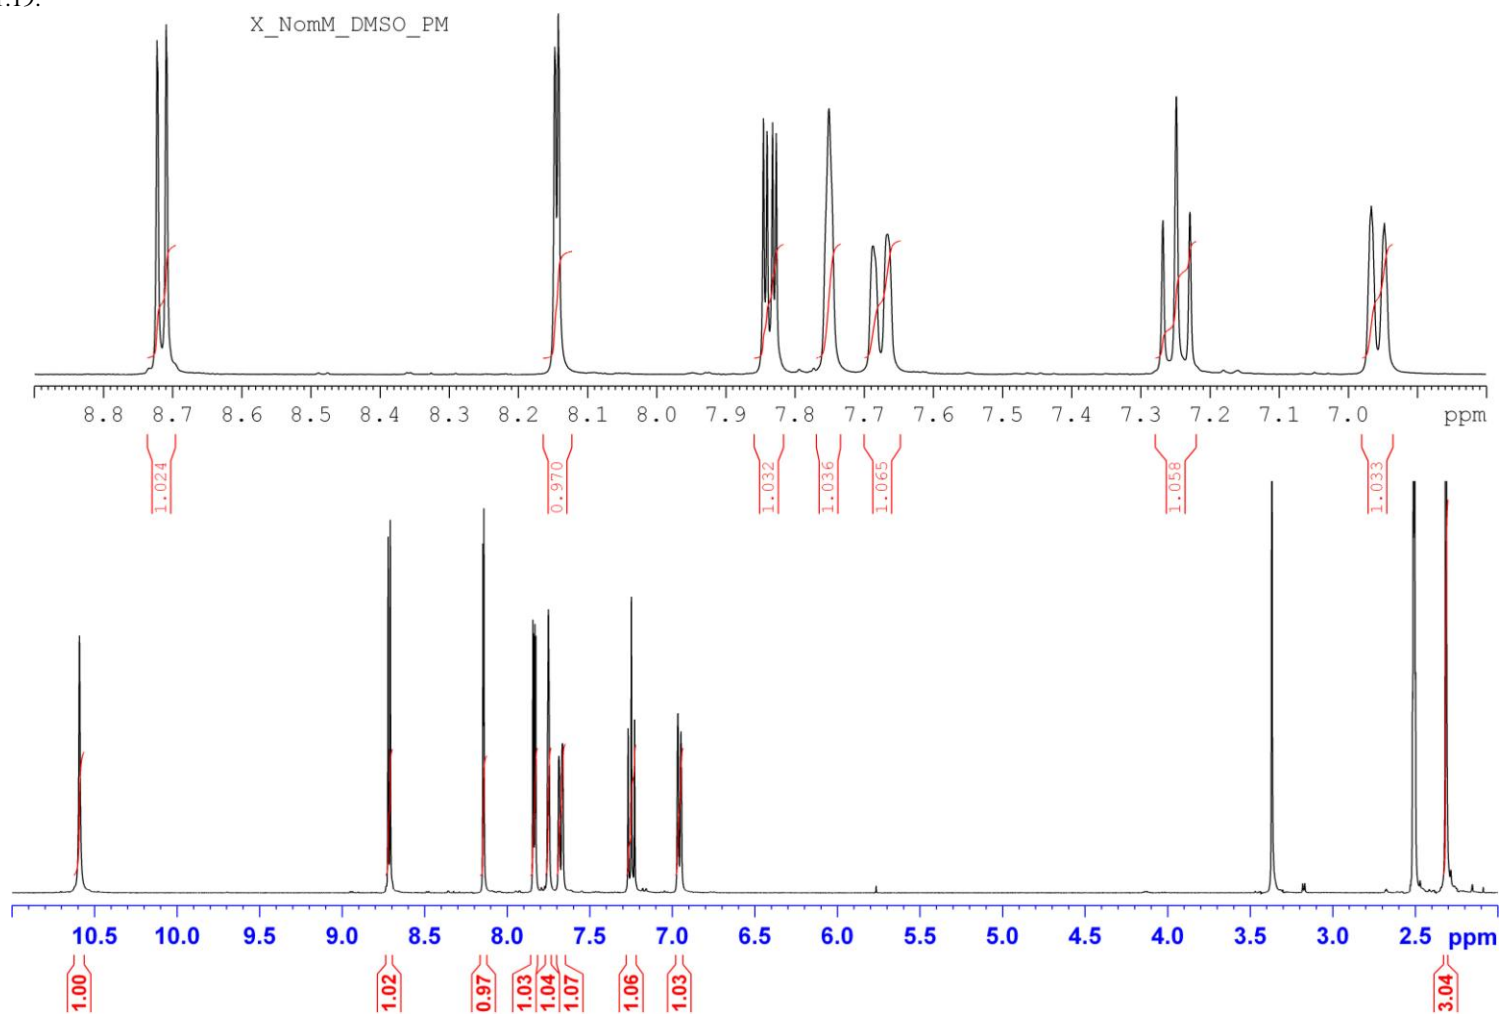

**2.12. 5-Cl-NooM**

**<sup>1</sup>H NMR (CDCl<sub>3</sub>)** δ 2.34 (3H, s), 7.03 (1H, td, <sup>3</sup>J = 7.4, <sup>4</sup>J = 1.2), 7.16 (1H, d, <sup>3</sup>J = 7.5), 7.21 (1H, t, <sup>3</sup>J = 7.7), 7.42 (1H, dd, <sup>3</sup>J = 5.2, <sup>4</sup>J = 2.0), 8.17 (1H, dd, <sup>3</sup>J = 8, <sup>3</sup>J = 0.9), 8.24 (1H, dd, <sup>3</sup>J = 2, <sup>3</sup>J = 0.4), 8.45 (1H, d, <sup>3</sup>J = 5.2), 9.90 (1H, br s); **<sup>1</sup>H NMR (DMSO-*d*<sub>6</sub>)** δ 2.30 (3H, s), 7.15 (1H, t, <sup>3</sup>J = 7.4), 7.25 (1H, t, <sup>3</sup>J = 7.7), 7.29 (1H, d, <sup>3</sup>J = 7.5), 7.75 (1H, d, <sup>3</sup>J = 7.7), 7.86 (1H, dd, <sup>3</sup>J = 5.3, <sup>3</sup>J = 2), 8.16 (1H, d, <sup>3</sup>J = 1.6), 8.73 (1H, d, <sup>3</sup>J = 5.3), 10.30 (1H, br s); **<sup>13</sup>C NMR (DMSO-*d*<sub>6</sub>)** δ 17.50, 122.26, 123.65, 125.38, 126.24, 126.87, 130.34, 130.90, 135.66, 144.92, 150.13, 151.44, 160.89.

X\_NoM\_DMSO\_PM

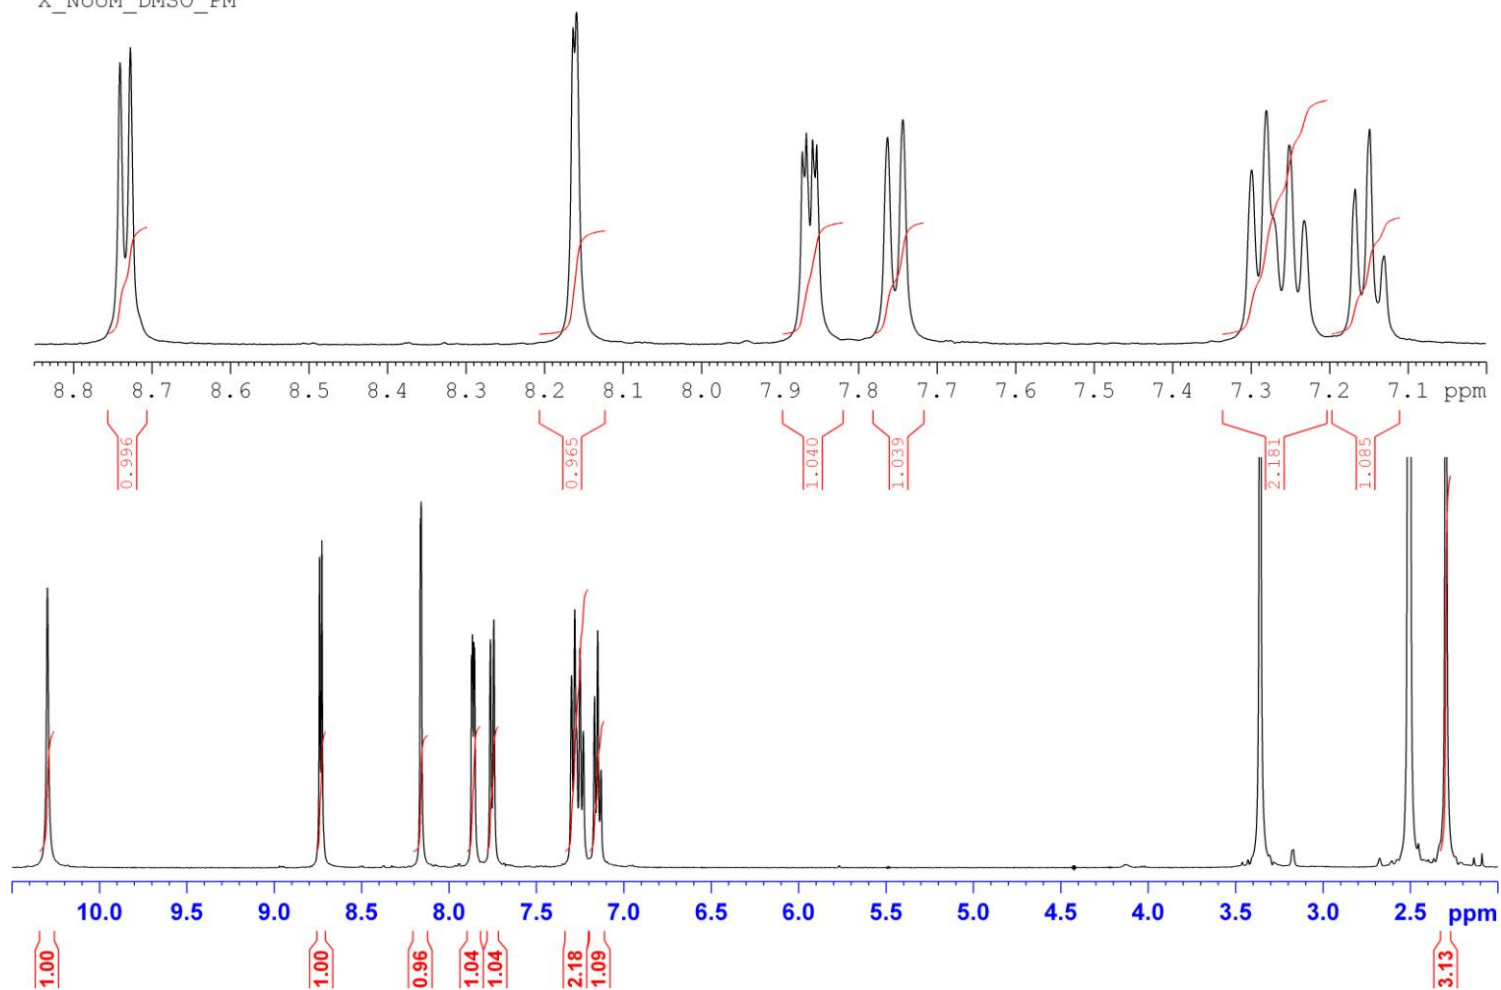

**3. IR (ATR)**

**3.1. NppM**

IR (ATR): 3321 (m), 1647 (s), 1598 (s), 1555 (m), 1512 (s), 1405 (s).

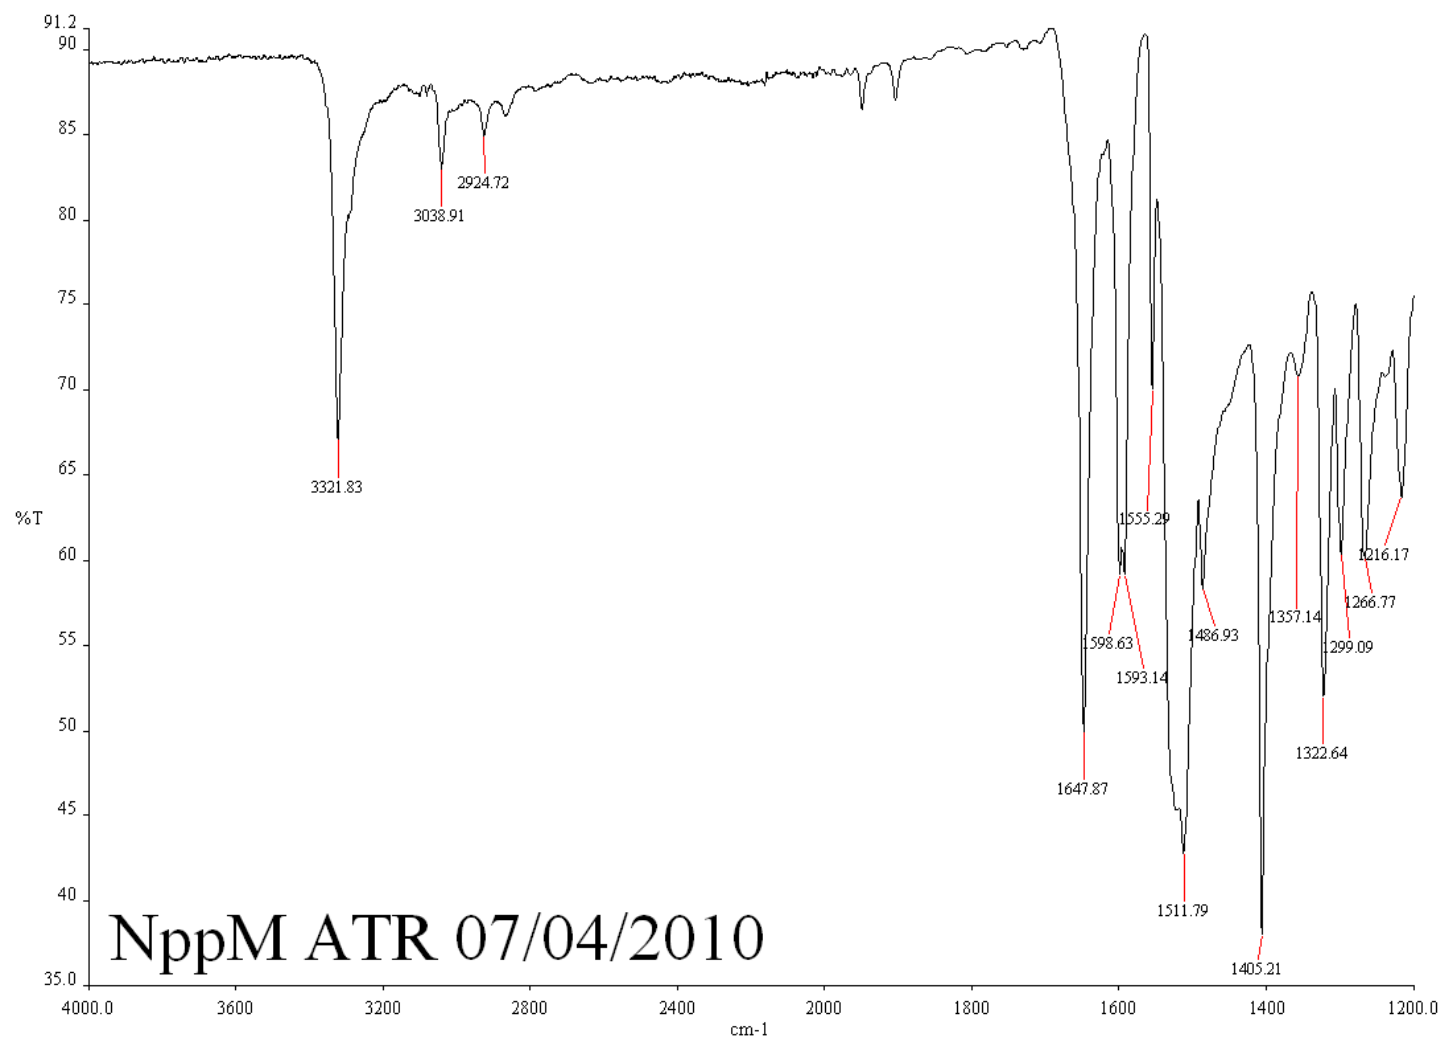



**3.2. NpmM**

IR (ATR): 3264 (w), 1669 (s), 1597 (m), 1551(s), 1431 (m), 1415(m);

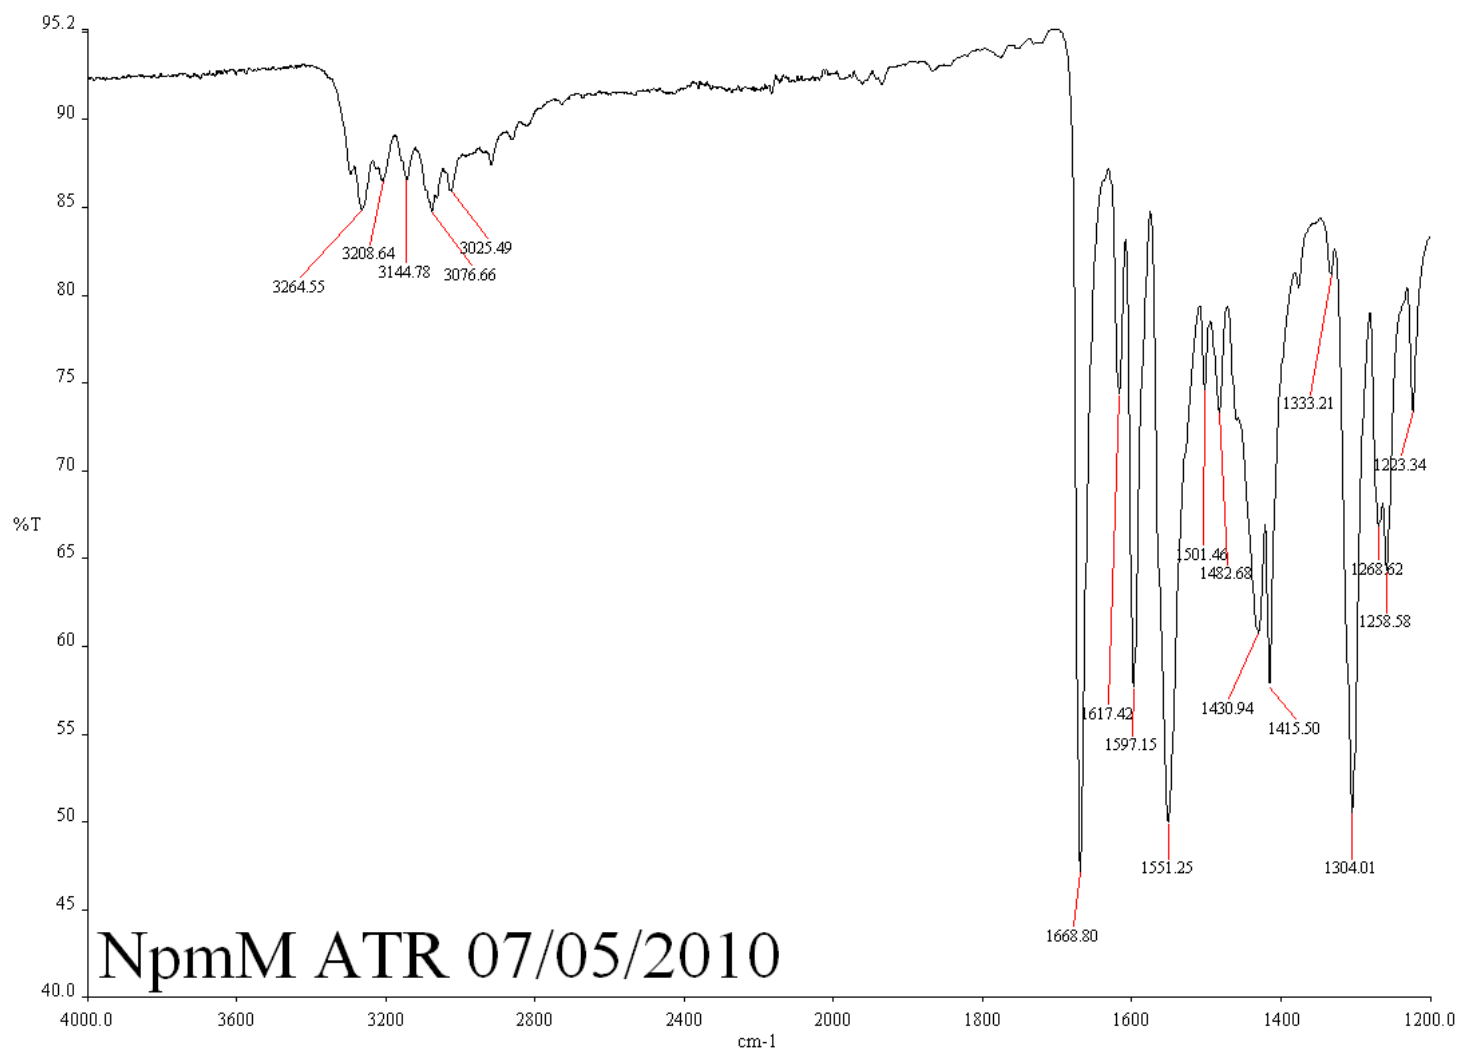

**3.3. NpoM**

IR (ATR): 3241 (m), 3035 (w), 1649 (s), 1584(m), 1551 (m), 1518 (s), 1451 (m), 1408 (m);

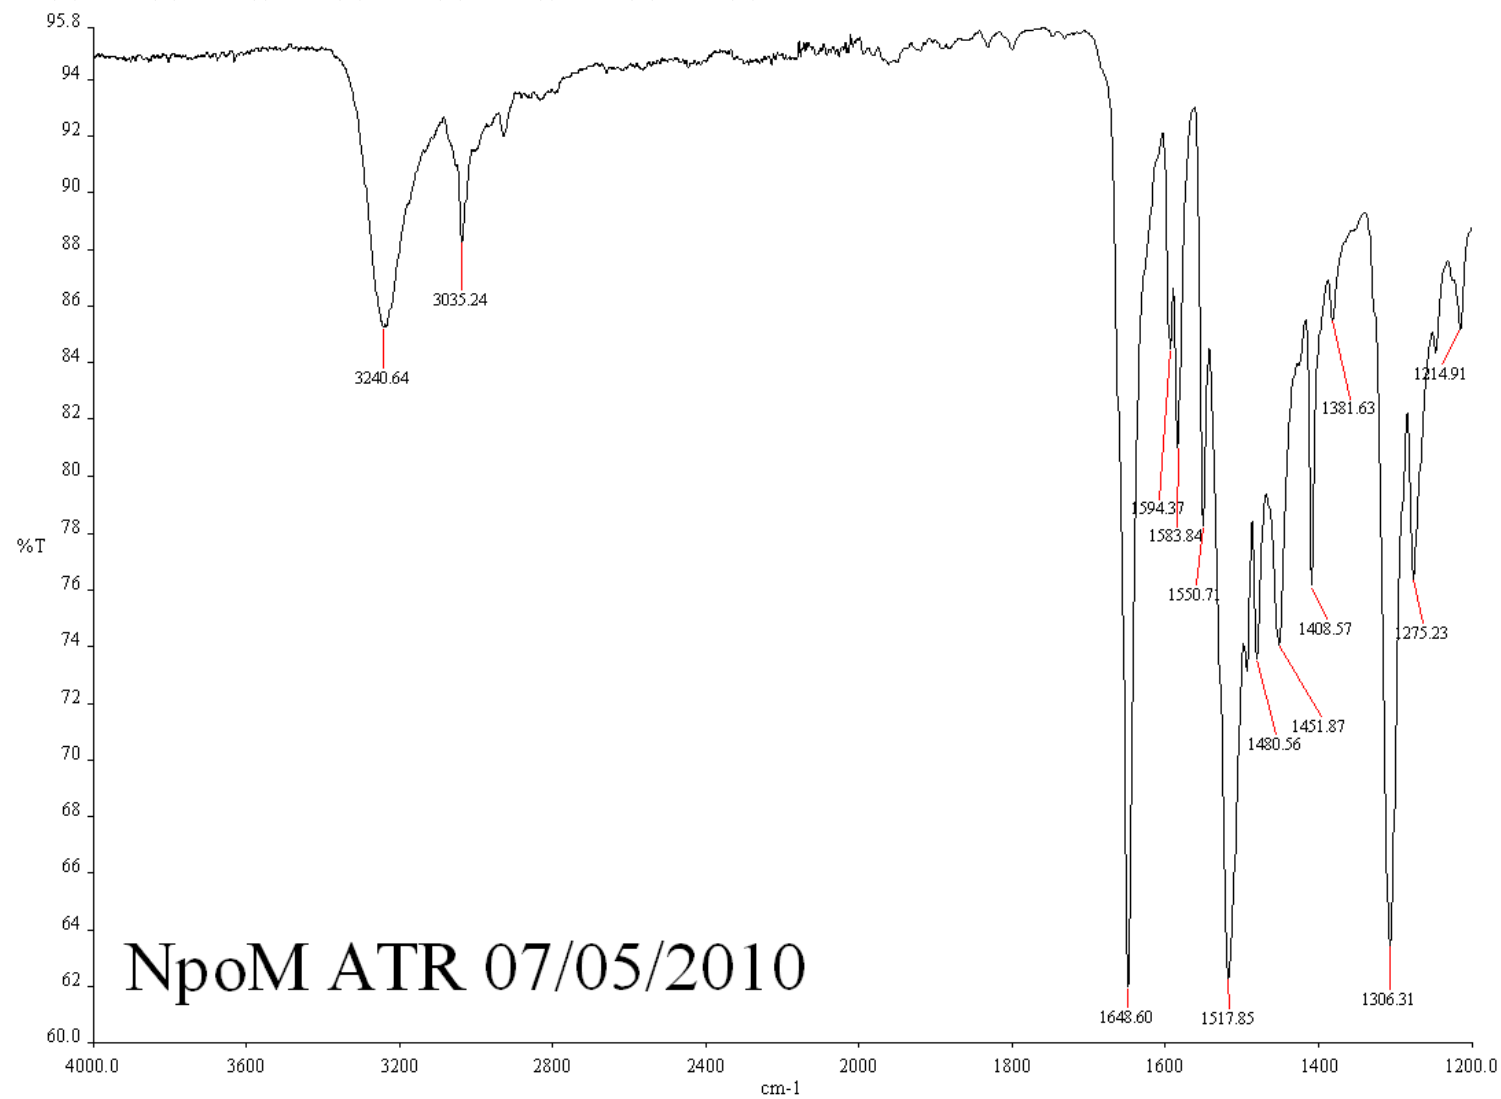

### 3.4. NmpM

IR (ATR): 3303 (m), 1672 (s), 1605 (s), 1535 (s), 1509 (s), 1483 (s), 1419 (s)

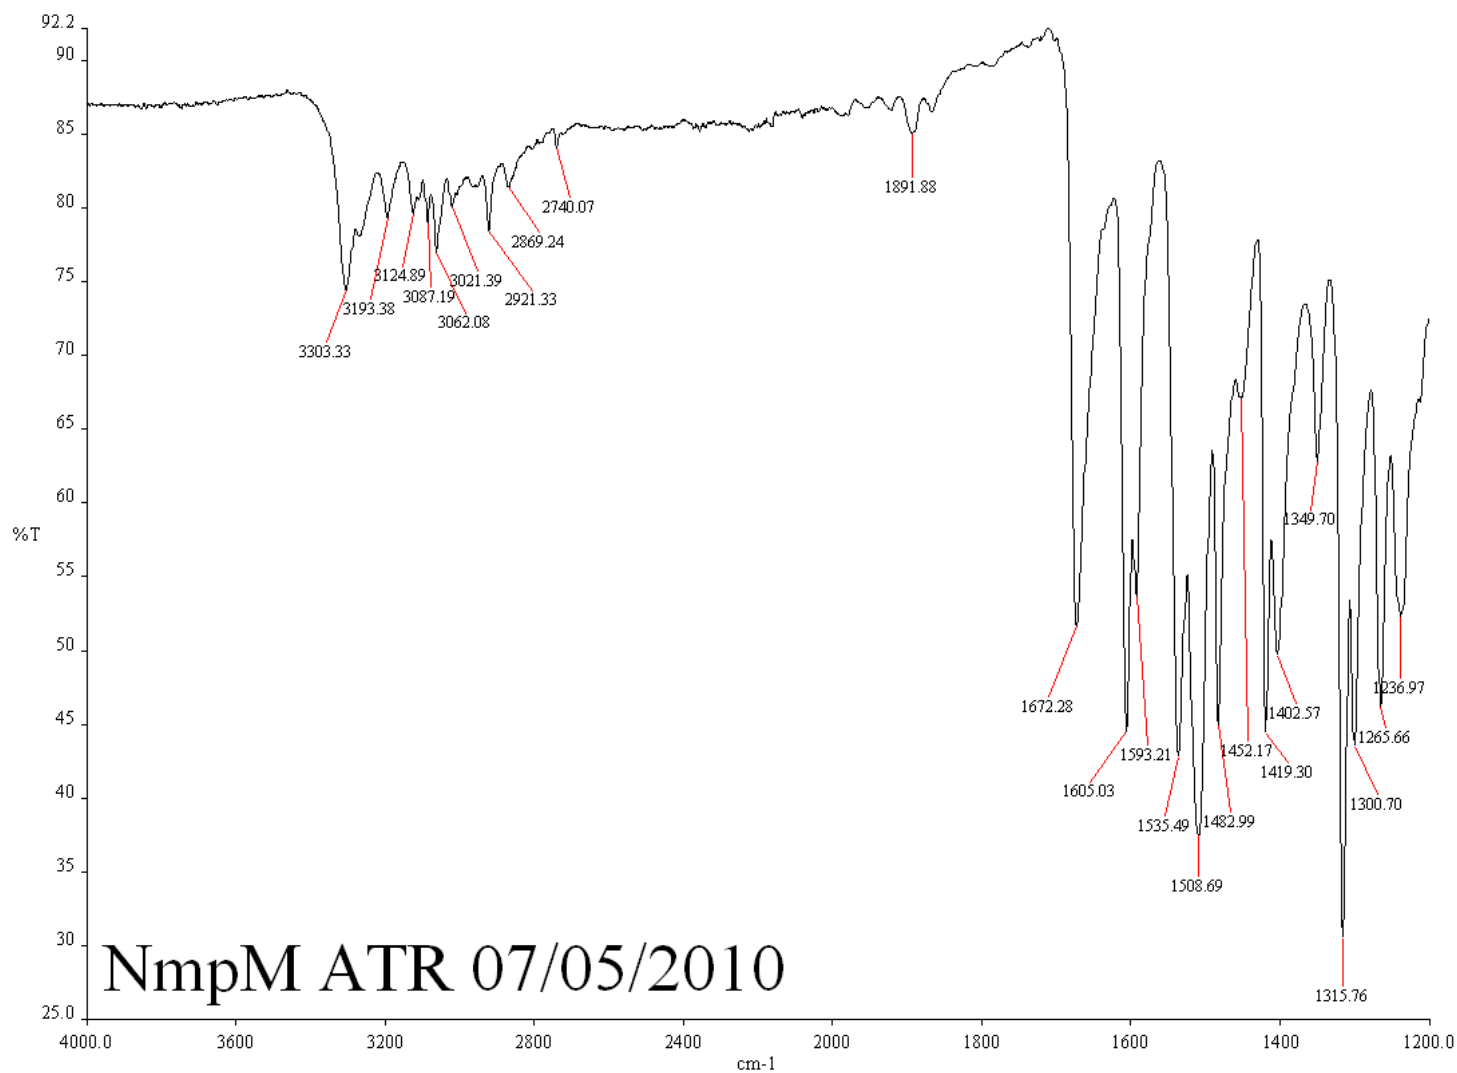

**3.5. NmmM**

IR (ATR): 3252 (w), 3066 (w), 1674 (s), 1589 (s), 1551 (s), 1485 (m), 1416 (s)

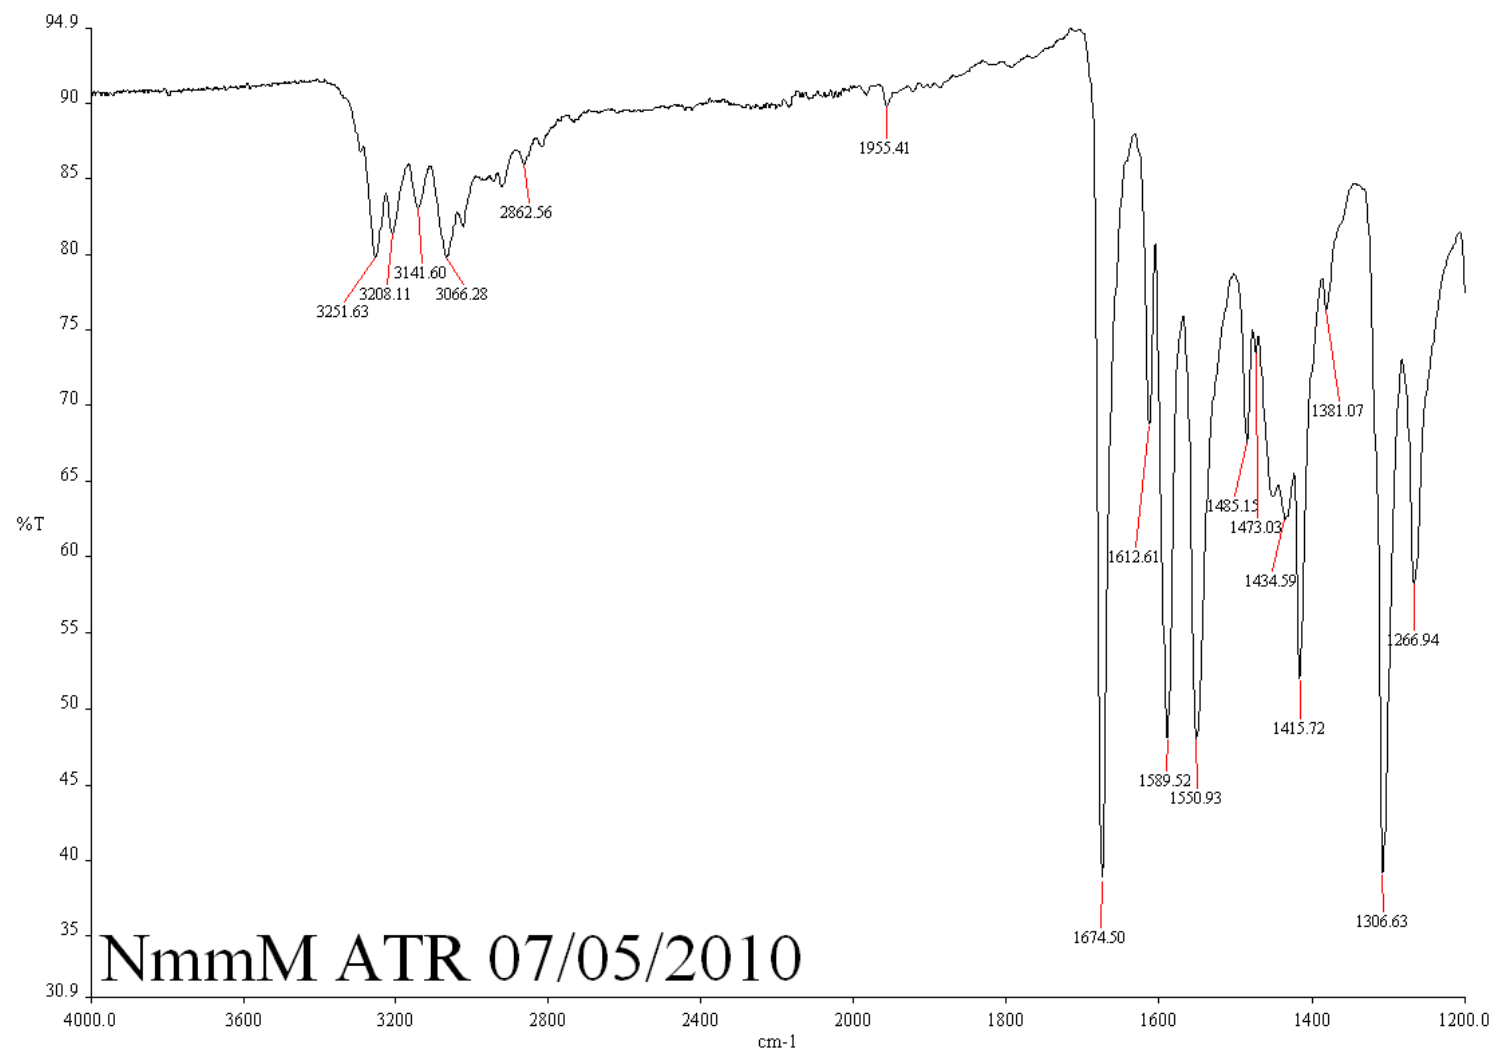

**3.6. NmoM**

IR (ATR): 3241 (m), 1653 (s), 1593 (s), 1523 (s), 1487(s), 1438 (m), 1418 (m);

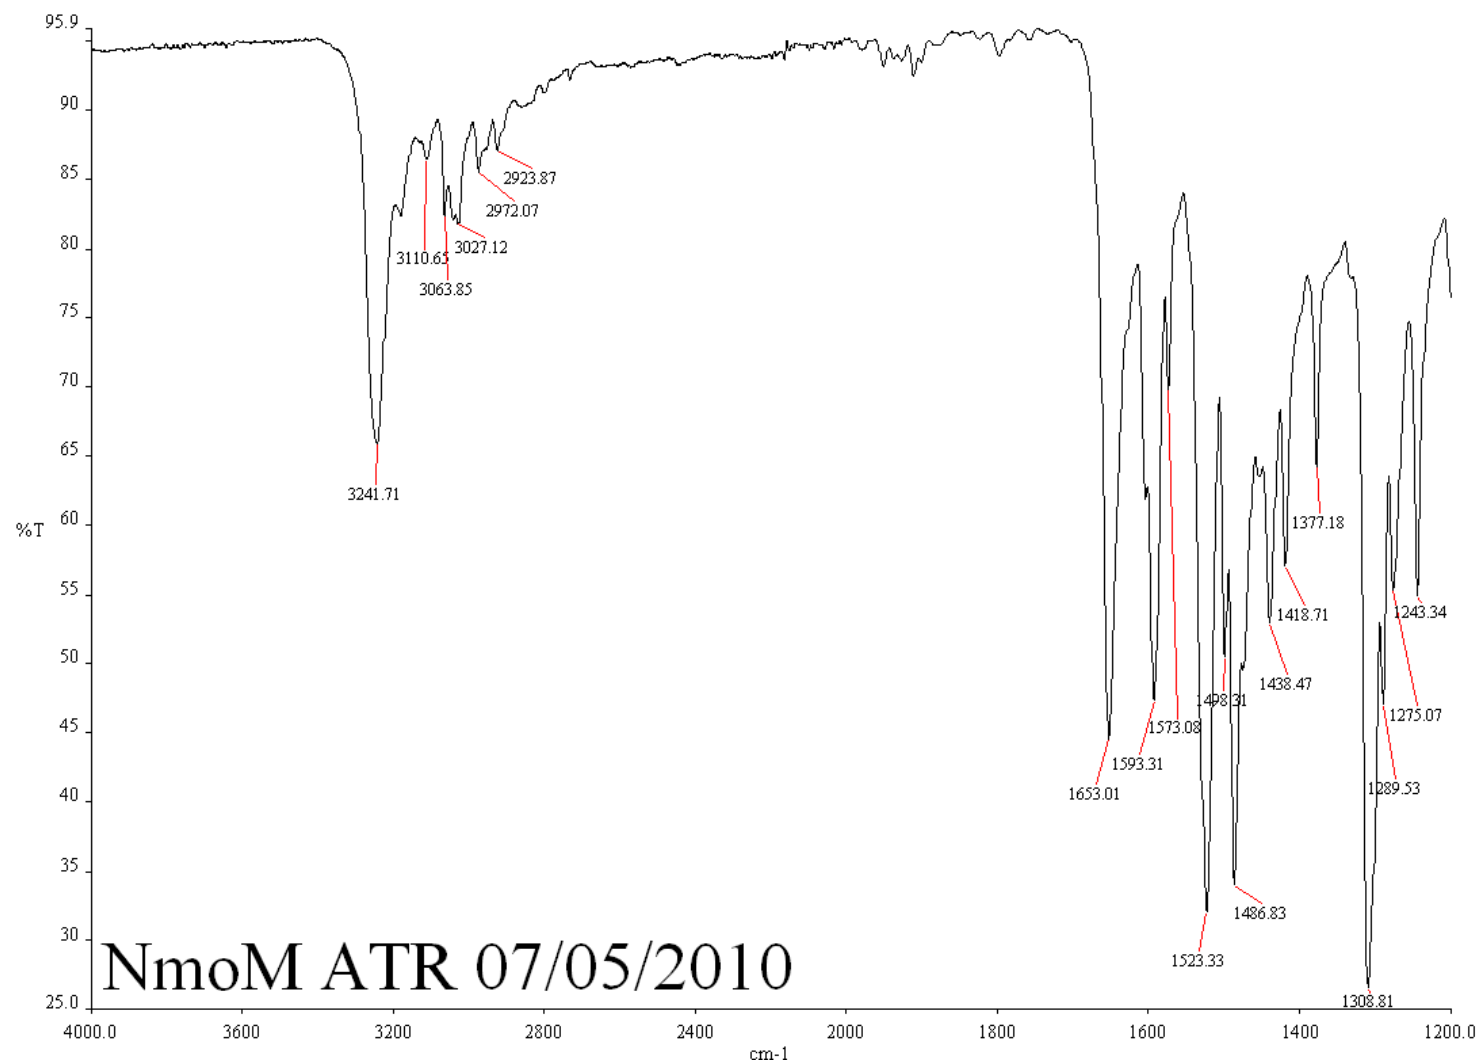

**3.7. NopM**

IR (ATR): 3336 (m), 1676 (s), 1588 (s), 1509 (s), 1463 (m), 1435 (m), 1406 (s);

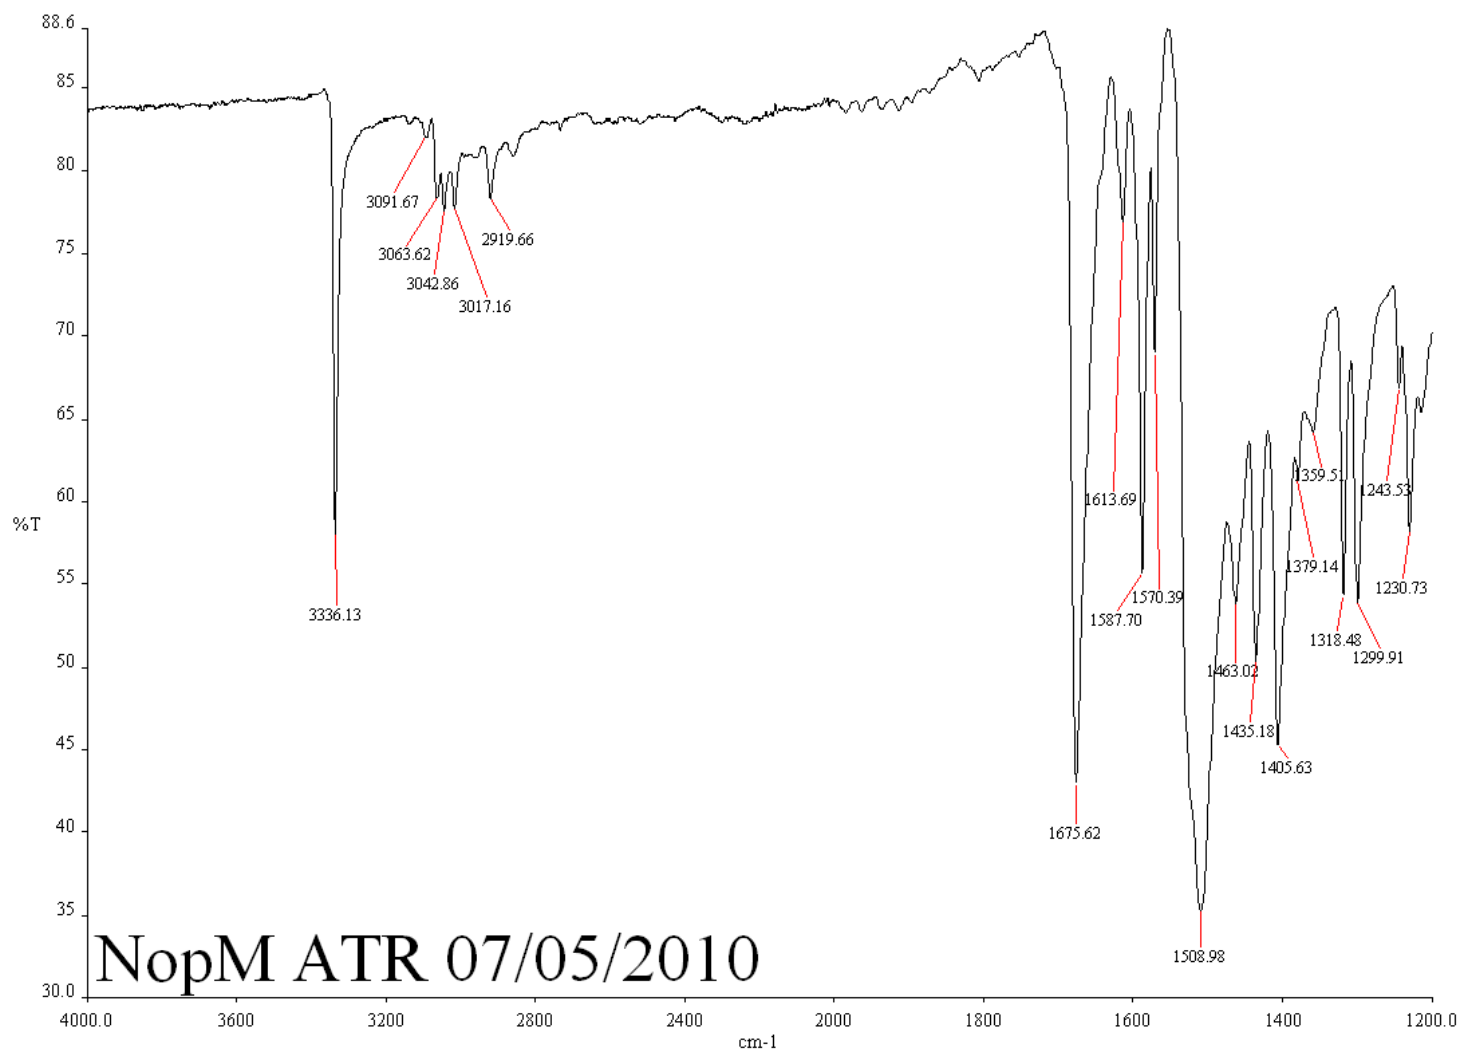

**3.8. NomM**

IR (ATR): 3286 (m), 1663 (s), 1587 (m), 1532 (s), 1444 (m), 1426 (s);

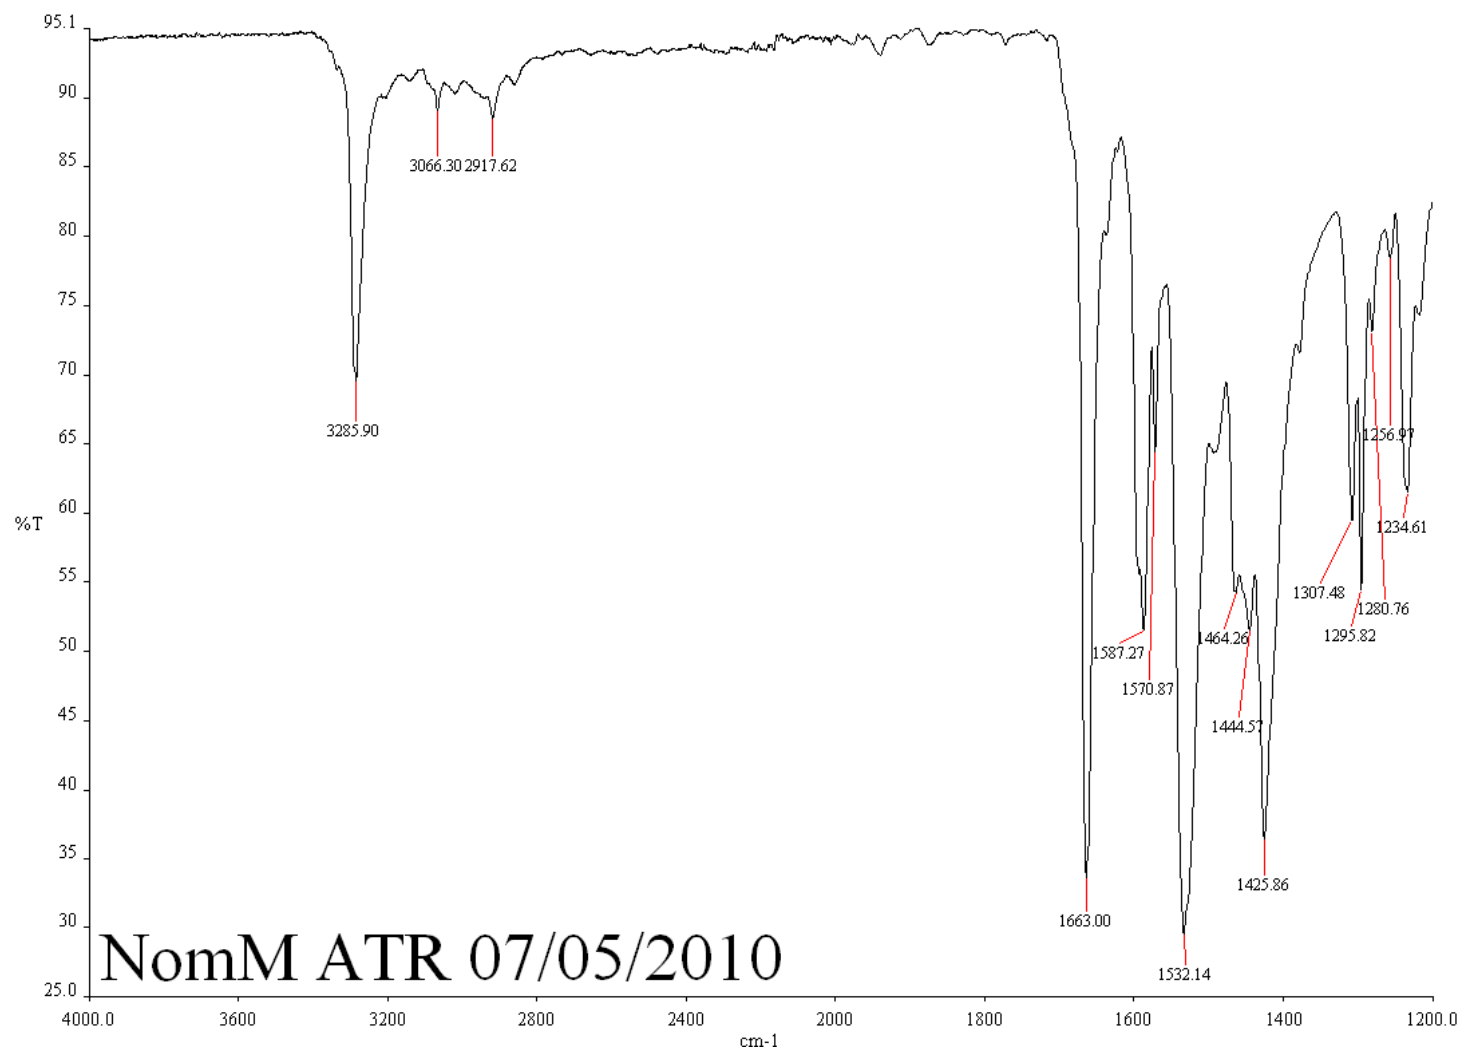

**3.9. NooM**

IR (ATR): 3343 (m), 1690 (s), 1587 (s), 1569 (m), 1532 (s), 1486 (m), 1455 (s), 1433 (s);

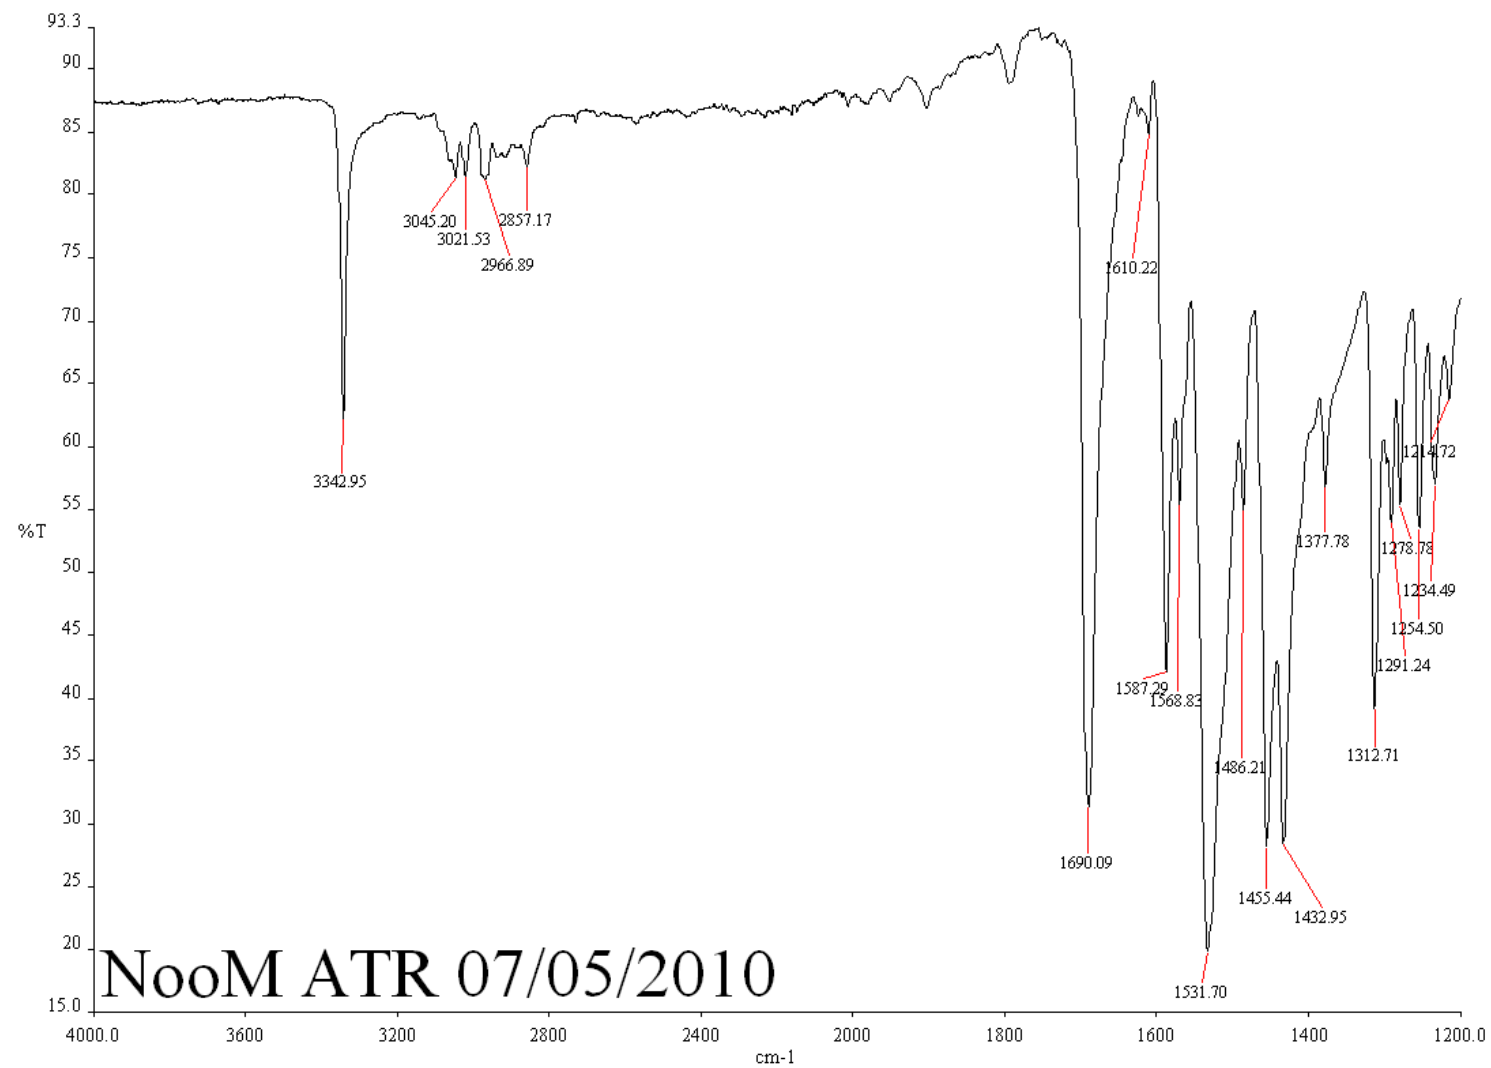



**3.10. 5-Cl-NopM**

IR (ATR): 3329 (s), 1670 (s), 1591 (m), 1573 (m), 1557 (m), 1525 (s), 1463 (m), 1409 (s);

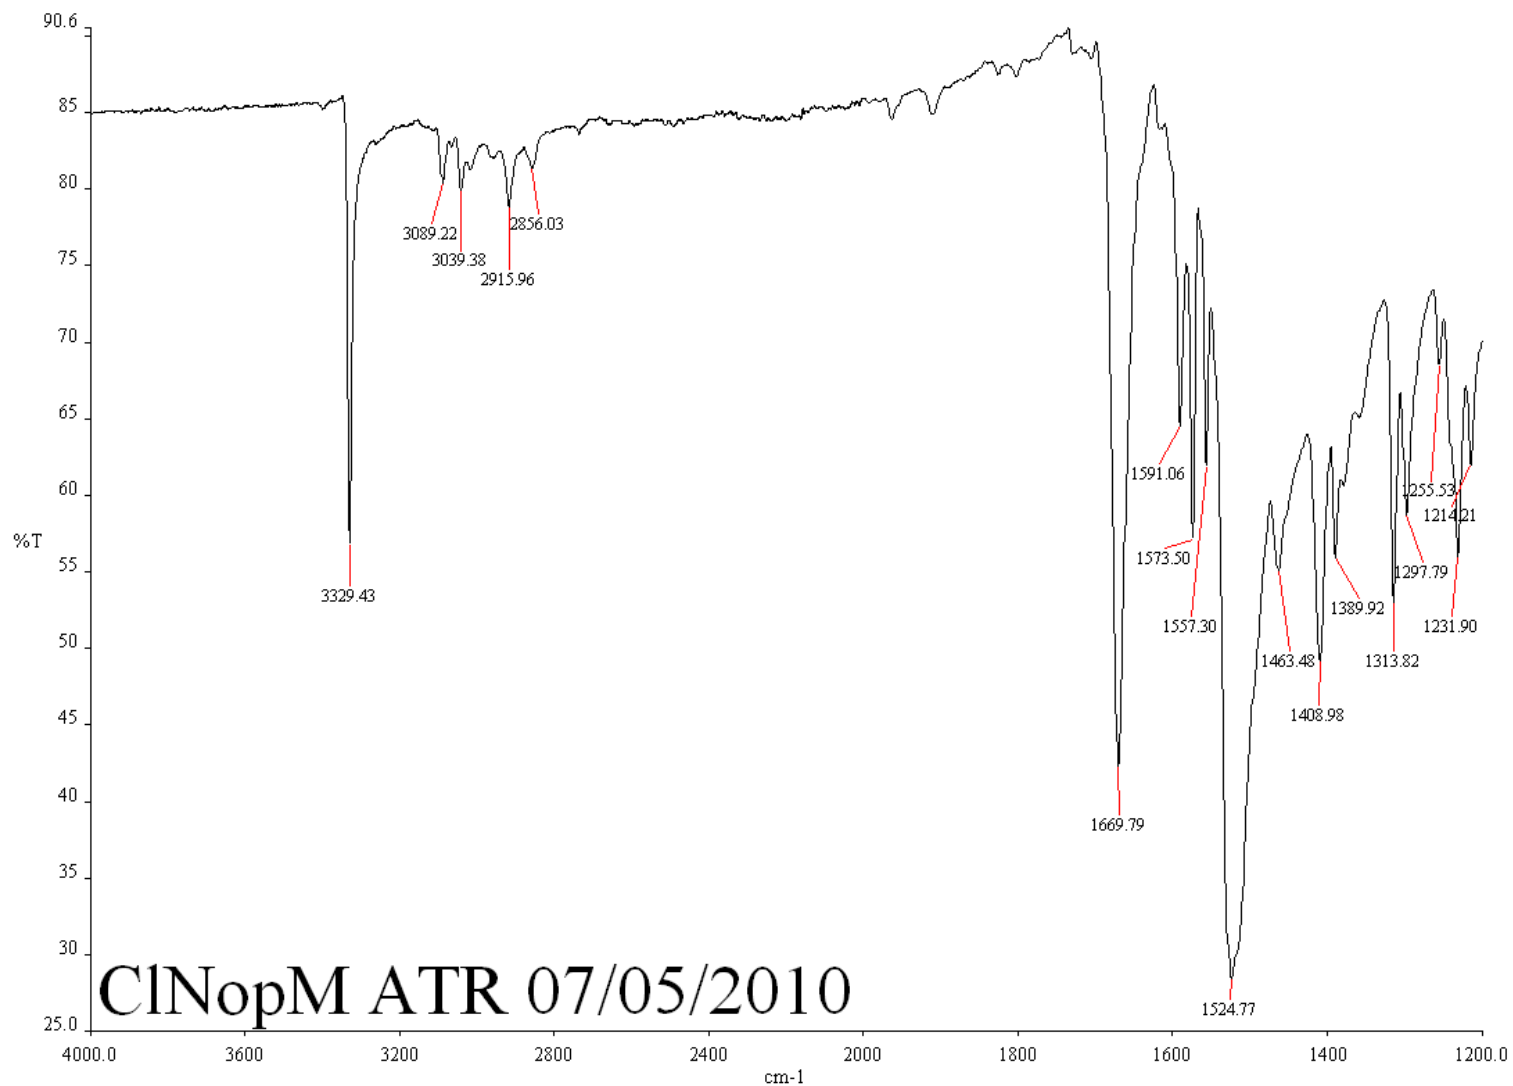

**3.11. 5-Cl-NomM**

IR (ATR): 3317 (m), 1677(m), 1665 (s), 1595 (m), 1580 (m), 1538 (s), 1484 (m), 1457 (m), 1430 (m);

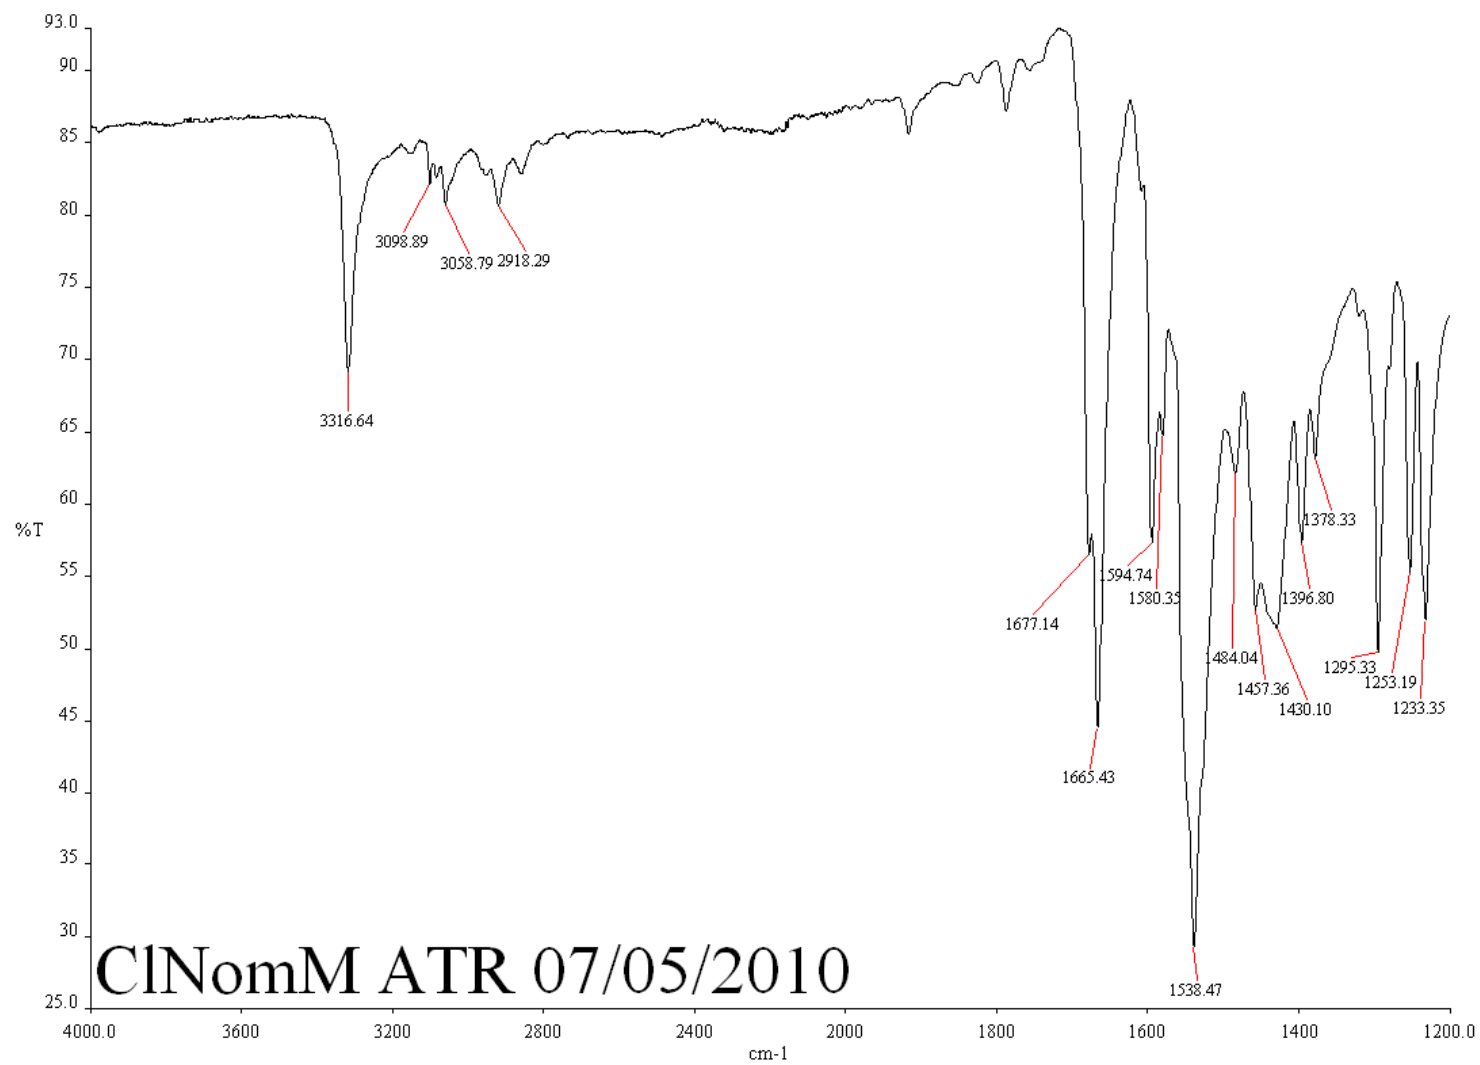

**3.12. 5-Cl-NooM**

IR (ATR): 3347 (s), 1684 (s), 1581 (s), 1536 (s), 1486 (s), 1458 (s), 1396 (m);

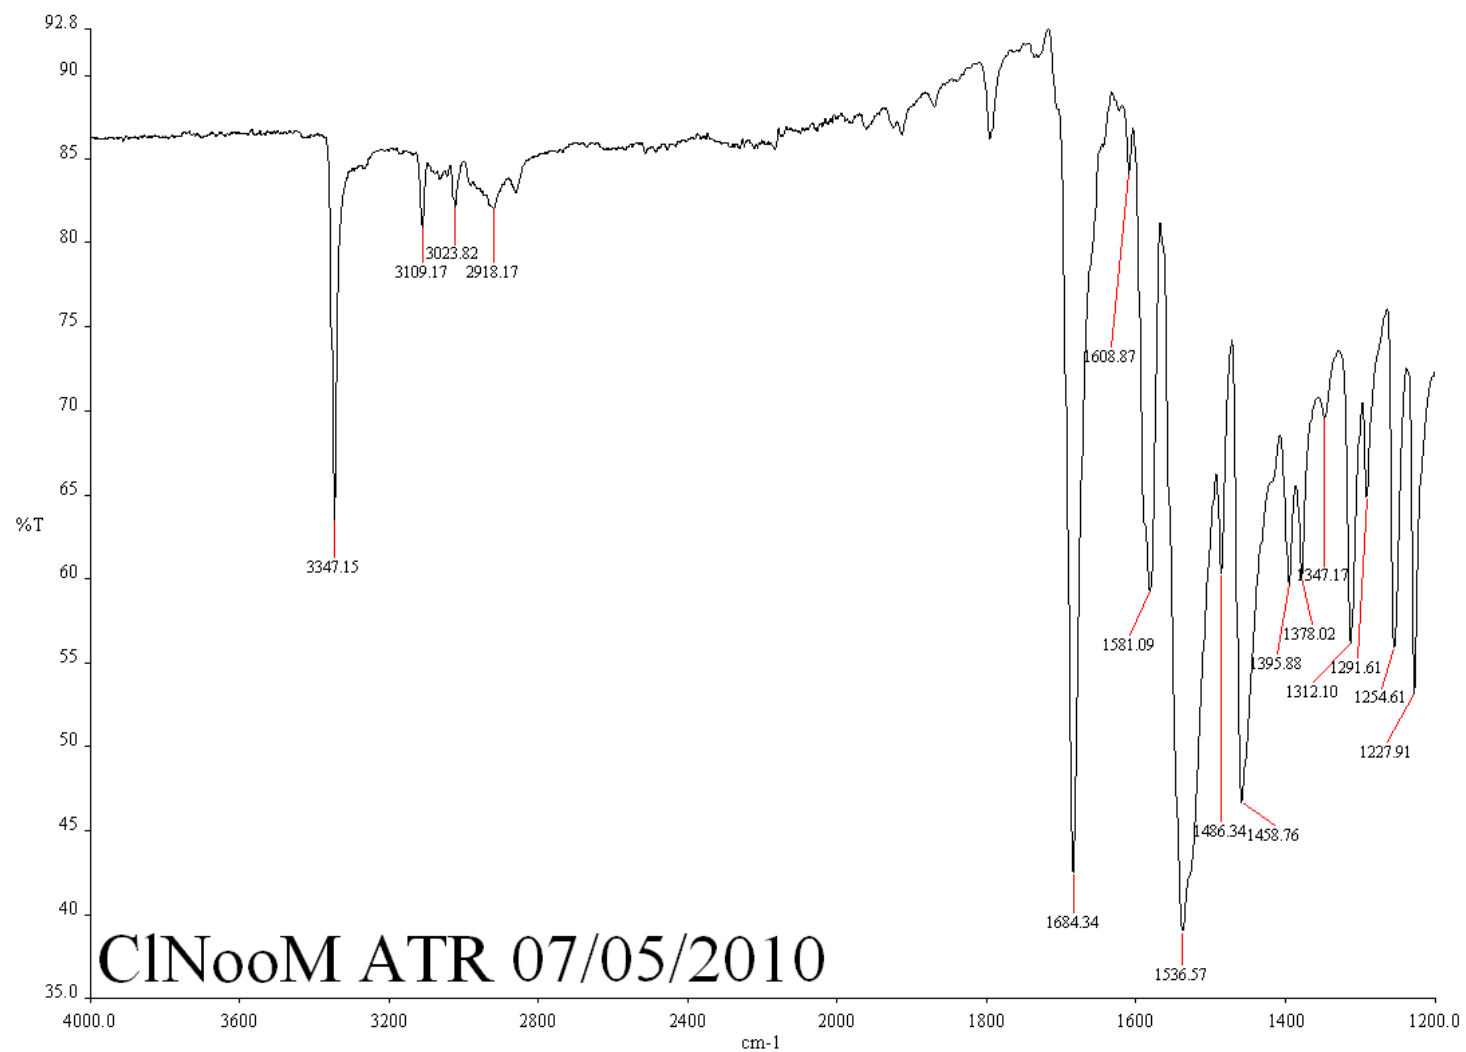

**4. Crystallographic details for nine NxxM isomers.**

**4.1. Table 2. Experimental details for the nine NxxM isomers**

For all NxxM structures: C<sub>13</sub>H<sub>12</sub>N<sub>2</sub>O, M<sub>r</sub> = 212.25. Experiments were undertaken at 294(1) K with Mo K $\alpha$  radiation using an Xcalibur, Sapphire3, Gemini Ultra diffractometer. H atoms were treated by a mixture of independent (N-H) and constrained refinement (C-H).

|                                                                                                                         | NppM                                                      | NpmM                                                      | NpoM                                                      | NmpM                                                       | NmmM                                                       |
|-------------------------------------------------------------------------------------------------------------------------|-----------------------------------------------------------|-----------------------------------------------------------|-----------------------------------------------------------|------------------------------------------------------------|------------------------------------------------------------|
| <b>Crystal data</b>                                                                                                     |                                                           |                                                           |                                                           |                                                            |                                                            |
| Crystal system, space group                                                                                             | Monoclinic, <i>P2<sub>1</sub>/c</i>                       | Monoclinic, <i>P2<sub>1</sub>/n</i>                       | Monoclinic, <i>Cc</i>                                     | Monoclinic, <i>P2<sub>1</sub>/c</i>                        | Triclinic, <i>P</i> <sup>-1</sup>                          |
| <i>a</i> , <i>b</i> , <i>c</i> (Å)                                                                                      | 7.7391(4),<br>5.2338(2),<br>26.9102(13)                   | 8.2919(3),<br>10.2600(3),<br>13.5713(4)                   | 13.0101(6),<br>10.4826(3),<br>9.7957(4)                   | 10.5017(5),<br>4.8807(2),<br>21.3459(9)                    | 9.3767(4),<br>9.9187(3),<br>12.3386(4)                     |
| $\alpha$ , $\beta$ , $\gamma$ (°)                                                                                       | 90, 90.321(5),<br>90                                      | 90, 100.919(3),<br>90                                     | 90, 122.729(6),<br>90                                     | 90, 100.868(4),<br>90                                      | 86.958(3),<br>86.980(3),<br>71.410(3)                      |
| <i>V</i> (Å <sup>3</sup> )                                                                                              | 1089.98(9)                                                | 1133.67(6)                                                | 1123.84(11)                                               | 1074.47(8)                                                 | 1085.36(7)                                                 |
| <i>Z</i>                                                                                                                | 4                                                         | 4                                                         | 4                                                         | 4                                                          | 4                                                          |
| $\mu$ (mm <sup>-1</sup> )                                                                                               | 0.08                                                      | 0.08                                                      | 0.08                                                      | 0.09                                                       | 0.08                                                       |
| Crystal size (mm)                                                                                                       | 0.53×0.33×0.14                                            | 0.38×0.24×0.06                                            | 0.47×0.43×0.25                                            | 0.67×0.06×0.06                                             | 0.44×0.34×0.18                                             |
| <b>Data collection</b>                                                                                                  |                                                           |                                                           |                                                           |                                                            |                                                            |
| Absorption correction                                                                                                   | Analytical (ABSFAC, Clark & Reid, 1998)                   | Analytical (ABSFAC, Clark and Reid, 1998)                 | Analytical (ABSFAC, Clark and Reid, 1998)                 | Analytical (ABSFAC, Clark and Reid, 1998)                  | Analytical (ABSFAC, Clark and Reid, 1998)                  |
| <i>T</i> <sub>min</sub> , <i>T</i> <sub>max</sub>                                                                       | 0.966, 0.988                                              | 0.970, 0.995                                              | 0.963, 0.980                                              | 0.945, 0.995                                               | 0.964, 0.985                                               |
| No. of measured, independent and observed reflections                                                                   | 8356, 8356,<br>5194 { <i>I</i> > 2 $\sigma$ ( <i>I</i> )} | 5751, 1836,<br>1170 { <i>I</i> > 2 $\sigma$ ( <i>I</i> )} | 8432, 1285,<br>1109 { <i>I</i> > 2 $\sigma$ ( <i>I</i> )} | 11243, 2070,<br>1001 { <i>I</i> > 2 $\sigma$ ( <i>I</i> )} | 26207, 6987,<br>4966 { <i>I</i> > 2 $\sigma$ ( <i>I</i> )} |
| <i>R</i> <sub>int</sub>                                                                                                 | 0.00                                                      | 0.024                                                     | 0.031                                                     | 0.055                                                      | 0.026                                                      |
| <b>Refinement</b>                                                                                                       |                                                           |                                                           |                                                           |                                                            |                                                            |
| <i>R</i> [ <i>F</i> <sup>2</sup> > 2 $\sigma$ ( <i>F</i> <sup>2</sup> )], <i>wR</i> ( <i>F</i> <sup>2</sup> ), <i>S</i> | 0.051, 0.141, 0.97                                        | 0.034, 0.083, 0.90                                        | 0.030, 0.081, 0.99                                        | 0.036, 0.073, 0.77                                         | 0.057, 0.179, 1.09                                         |
| No. of reflections                                                                                                      | 8356                                                      | 1836                                                      | 1285                                                      | 2070                                                       | 6987                                                       |
| No. of parameters                                                                                                       | 152                                                       | 151                                                       | 150                                                       | 151                                                        | 299                                                        |
| No. of restraints                                                                                                       | 0                                                         | 0                                                         | 2                                                         | 0                                                          | 0                                                          |
| $\Delta$ <sub>max</sub> , $\Delta$ <sub>min</sub> (e <sup>Å</sup> <sup>-3</sup> )                                       | 0.30, -0.25                                               | 0.11, -0.09                                               | 0.14, -0.11                                               | 0.12, -0.10                                                | 0.28, -0.24                                                |

|                                                                                                                | NmoM                                              | NopM                                              | NomM                                              | NooM                                             |
|----------------------------------------------------------------------------------------------------------------|---------------------------------------------------|---------------------------------------------------|---------------------------------------------------|--------------------------------------------------|
| <b>Crystal data</b>                                                                                            |                                                   |                                                   |                                                   |                                                  |
| Crystal system, space group                                                                                    | Orthorhombic, <i>Pbca</i>                         | Monoclinic, <i>P2<sub>1</sub>/c</i>               | Monoclinic, <i>P2<sub>1</sub></i>                 | Monoclinic, <i>P2<sub>1</sub>/c</i>              |
| <i>a</i> , <i>b</i> , <i>c</i> (Å)                                                                             | 8.0664(2),<br>9.4009(2),<br>29.5324(8)            | 6.0828(2),<br>27.0507(8),<br>7.1963(3)            | 9.2326(4),<br>14.0836(4),<br>9.4162(4)            | 7.7696(2),<br>17.6232(3),<br>8.8462(3)           |
| $\alpha$ , $\beta$ , $\gamma$ (°)                                                                              | 90, 90, 90                                        | 90, 111.673(4), 90                                | 90, 105.661(4), 90                                | 90, 114.817(4), 90                               |
| <i>V</i> (Å <sup>3</sup> )                                                                                     | 2239.48(10)                                       | 1100.40(7)                                        | 1178.92(8)                                        | 1099.41(5)                                       |
| <i>Z</i>                                                                                                       | 8                                                 | 4                                                 | 4                                                 | 4                                                |
| $\mu$ (mm <sup>-1</sup> )                                                                                      | 0.08                                              | 0.08                                              | 0.08                                              | 0.08                                             |
| Crystal size (mm)                                                                                              | 0.42×0.34×0.06                                    | 0.25×0.22×0.06                                    | 0.22×0.16×0.05                                    | 0.44×0.13×0.11                                   |
| <b>Data collection</b>                                                                                         |                                                   |                                                   |                                                   |                                                  |
| Absorption correction                                                                                          | Analytical (ABSFAC, Clark and Reid, 1998)         | Analytical (ABSFAC, Clark and Reid, 1998)         | Analytical (ABSFAC, Clark and Reid, 1998)         | Analytical (ABSFAC, Clark and Reid, 1998)        |
| <i>T</i> <sub>min</sub> , <i>T</i> <sub>max</sub>                                                              | 0.967, 0.995                                      | 0.980, 0.995                                      | 0.983, 0.996                                      | 0.964, 0.991                                     |
| No. of measured, independent and observed reflections                                                          | 13292, 2421, 1591<br>{ <i>I</i> > 2σ( <i>I</i> )} | 6058, 1970, 1176<br>{ <i>I</i> > 2 σ( <i>I</i> )} | 16614, 2780, 1026<br>{ <i>I</i> > 2σ( <i>I</i> )} | 7586, 2389, 1541<br>{ <i>I</i> > 2σ( <i>I</i> )} |
| <i>R</i> <sub>int</sub>                                                                                        | 0.036                                             | 0.038                                             | 0.096                                             | 0.021                                            |
| <b>Refinement</b>                                                                                              |                                                   |                                                   |                                                   |                                                  |
| <i>R</i> [ <i>F</i> <sup>2</sup> > 2σ( <i>F</i> <sup>2</sup> )], <i>wR</i> ( <i>F</i> <sup>2</sup> ), <i>S</i> | 0.040, 0.107, 0.98                                | 0.035, 0.083, 0.84                                | 0.029, 0.045, 0.67                                | 0.037, 0.093, 0.93                               |
| No. of reflections                                                                                             | 2421                                              | 1970                                              | 2780                                              | 2389                                             |
| No. of parameters                                                                                              | 150                                               | 150                                               | 298                                               | 151                                              |
| No. of restraints                                                                                              | 0                                                 | 0                                                 | 1                                                 | 0                                                |
| $\Delta$ <sub>max</sub> , $\Delta$ <sub>min</sub> (e Å <sup>-3</sup> )                                         | 0.15, -0.13                                       | 0.14, -0.11                                       | 0.08, -0.08                                       | 0.14, -0.11                                      |

Computer programs: CrysAlisPro, Oxford Diffraction Ltd., Version 1.171.33.55 (release 05-01-2010 CrysAlis171 .NET) (compiled Jan 5 2010,16:28:46), *SHELXS97* (Sheldrick, 2008), *SHELXL97* (Sheldrick, 2008) and SORTX (McArdle, 1995), *PLATON* (Spek, 2009), *SHELXL97*.

This crystallographic experimental table was compiled using the IUCr facilities in Chester, U.K.

**4.2 Table 3. Experimental details for the three Cl-5-NxxM isomers and mixed system NmpFM**

Experiments were carried out at 294 (1) K with Mo  $K\alpha$  radiation using an Xcalibur, Sapphire3, Gemini Ultra diffractometer. H atoms were treated by a mixture of independent (N-H) and constrained refinement (C-H).

|                                                                    | 5-Cl_NopM                                          | 5-Cl_NomM                                          | 5-Cl_NooM                                          | NmpFM                                                                                                   |
|--------------------------------------------------------------------|----------------------------------------------------|----------------------------------------------------|----------------------------------------------------|---------------------------------------------------------------------------------------------------------|
| <b>Crystal data</b>                                                |                                                    |                                                    |                                                    |                                                                                                         |
| Chemical formula                                                   | C <sub>13</sub> H <sub>11</sub> ClN <sub>2</sub> O | C <sub>13</sub> H <sub>11</sub> ClN <sub>2</sub> O | C <sub>13</sub> H <sub>11</sub> ClN <sub>2</sub> O | C <sub>13</sub> H <sub>12</sub> N <sub>2</sub> O:C <sub>12</sub> H <sub>9</sub> FN <sub>2</sub> O (1/1) |
| $M_r$                                                              | 246.69                                             | 246.69                                             | 246.69                                             | 428.46                                                                                                  |
| Crystal system, space group                                        | Orthorhombic, <i>Pca2</i> <sub>1</sub>             | Monoclinic, <i>P2</i> <sub>1</sub> / <i>c</i>      | Monoclinic, <i>P2</i> <sub>1</sub> / <i>n</i>      | Orthorhombic, <i>Pna2</i> <sub>1</sub>                                                                  |
| <i>a</i> , <i>b</i> , <i>c</i> (Å)                                 | 7.36124 (11),<br>14.41068 (19),<br>11.21075 (16)   | 7.417 (2), 21.006<br>(4), 8.546 (2)                | 7.3288 (6),<br>7.4392 (5),<br>21.5025 (14)         | 19.870 (2), 10.8608 (9),<br>4.9241 (5)                                                                  |
| $\alpha$ , $\beta$ , $\gamma$ (°)                                  | 90, 90, 90                                         | 90, 115.28 (3),<br>90                              | 90, 91.481 (7),<br>90                              | 90, 90, 90                                                                                              |
| <i>V</i> (Å <sup>3</sup> )                                         | 1189.24 (3)                                        | 1204.0 (5)                                         | 1171.93 (15)                                       | 1062.66 (18)                                                                                            |
| <i>Z</i>                                                           | 4                                                  | 4                                                  | 4                                                  | 2                                                                                                       |
| $\mu$ (mm <sup>-1</sup> )                                          | 0.31                                               | 0.30                                               | 0.31                                               | 0.09                                                                                                    |
| Crystal size (mm)                                                  | 0.26 × 0.23 ×<br>0.16                              | 0.53 × 0.19 ×<br>0.11                              | 0.39 × 0.31 ×<br>0.10                              | 0.51 × 0.23 × 0.13                                                                                      |
| <b>Data collection</b>                                             |                                                    |                                                    |                                                    |                                                                                                         |
| Absorption correction                                              | Analytical<br>(ABSFAC, Clark<br>& Reid, 1998)      | Analytical<br>(ABSFAC, Clark<br>& Reid, 1998)      | Analytical<br>(ABSFAC, Clark<br>and Reid, 1998)    | Analytical<br>(ABSFAC, Clark and Reid,<br>1998)                                                         |
| $T_{\min}$ , $T_{\max}$                                            | 0.925, 0.953                                       | 0.857, 0.987                                       | 0.889, 0.970                                       | 0.954, 0.988                                                                                            |
| No. of measured,<br>independent and<br>observed reflections        | 8794, 8794, 7810<br>{ <i>I</i> > 2σ( <i>I</i> )}   | 8582, 2583, 1324<br>{ <i>I</i> > 2σ( <i>I</i> )}   | 9725, 3040, 2199<br>{ <i>I</i> > 2σ( <i>I</i> )}   | 6723, 1286, 1045                                                                                        |
| $R_{\text{int}}$                                                   | 0.00                                               | 0.048                                              | 0.017                                              | 0.021                                                                                                   |
| <b>Refinement</b>                                                  |                                                    |                                                    |                                                    |                                                                                                         |
| $R[F^2 > 2\sigma(F^2)]$ ,<br>$wR(F^2)$ , <i>S</i>                  | 0.026, 0.065,<br>0.98                              | 0.066, 0.233,<br>1.00                              | 0.038, 0.103,<br>1.07                              | 0.035, 0.093, 1.05                                                                                      |
| No. of reflections                                                 | 8794                                               | 2583                                               | 3040                                               | 1286                                                                                                    |
| No. of parameters                                                  | 160                                                | 160                                                | 160                                                | 159                                                                                                     |
| No. of restraints                                                  | 1                                                  | 0                                                  | 0                                                  | 1                                                                                                       |
| $\Delta_{\text{max}}$ , $\Delta_{\text{min}}$ (e Å <sup>-3</sup> ) | 0.10, -0.16                                        | 0.32, -0.20                                        | 0.19, -0.22                                        | 0.11, -0.10                                                                                             |

Computer programs: CrysAlisPro, Oxford Diffraction Ltd., Version 1.171.33.55 (release 05-01-2010 CrysAlis171 .NET) (compiled Jan 5 2010,16:28:46), *SHELXS97* (Sheldrick, 2008), *SHELXL97* (Sheldrick, 2008) and SORTX (McArdle, 1995), *PLATON* (Spek, 2009), *SHELXL97*. **The Flack parameter for 5-Cl\_NopM is 0.00(4) [data were not merged].**

This crystallographic experimental table was compiled using the IUCr facilities in Chester, U.K.

4.3 Table 4. Selected hydrogen-bond and contact parameters for the nine NxxM isomers.‡

| $D-H\cdots A$                                 | $D-H$ (Å)         | $H\cdots A$ (Å)   | $D\cdots A$ (Å)    | $D-H\cdots A$ (°) |
|-----------------------------------------------|-------------------|-------------------|--------------------|-------------------|
| <b>NppM</b> _[10-002]                         |                   |                   |                    |                   |
| <b>N1—H1<sup>i</sup>⋯O1<sup>i</sup></b>       | <b>0.832 (13)</b> | <b>2.270 (13)</b> | <b>3.0529 (14)</b> | <b>157.0 (11)</b> |
| <i>C12—H12⋯O1</i>                             | 0.93              | 2.47              | 2.9126 (17)        | 109               |
| <i>C12—H12⋯Cg1<sup>ii</sup></i>               | 0.93              | 2.89              | 3.5835 (16)        | 133               |
| <b>NpmM</b> _[10-003]                         |                   |                   |                    |                   |
| <b>N1—H1<sup>iii</sup>⋯N24<sup>iii</sup></b>  | <b>0.911 (15)</b> | <b>2.240 (16)</b> | <b>3.1265(18)</b>  | <b>164.1 (14)</b> |
| <i>C22—H22⋯N24<sup>iii</sup></i>              | 0.93              | 2.57              | 3.353 (2)          | 142               |
| <i>C12—H12⋯O1</i>                             | 0.93              | 2.28              | 2.8615 (19)        | 120               |
| <i>C23—H23⋯O1<sup>iv</sup></i>                | 0.93              | 2.41              | 3.2538 (19)        | 152               |
| <b>NpoM</b> _[10-004]                         |                   |                   |                    |                   |
| <b>N1—H1<sup>v</sup>⋯O1<sup>v</sup></b>       | <b>0.80 (3)</b>   | <b>2.06 (3)</b>   | <b>2.825 (2)</b>   | <b>159 (2)</b>    |
| <i>C17—H17E⋯N1</i>                            | 0.96              | 2.47              | 2.914 (3)          | 108               |
| <i>C23—H23⋯Cg1<sup>vi</sup></i>               | 0.93              | 2.90              | 3.713 (3)          | 147               |
| <b>NmpM</b> _[10-005]                         |                   |                   |                    |                   |
| <b>N1—H1<sup>vii</sup>⋯N23<sup>vii</sup></b>  | <b>0.879 (14)</b> | <b>2.367 (14)</b> | <b>3.223 (2)</b>   | <b>164.7 (12)</b> |
| <i>C12—H12⋯O1</i>                             | 0.93              | 2.24              | 2.841 (2)          | 122               |
| <i>C22—H22⋯N1</i>                             | 0.93              | 2.58              | 2.901 (2)          | 101               |
| <i>C22—H22⋯N23<sup>vii</sup></i>              | 0.93              | 2.39              | 3.318 (2)          | 176               |
| <i>C26—H26⋯O1<sup>viii</sup></i>              | 0.93              | 2.57              | 3.210 (2)          | 126               |
| <b>NmmM</b> _[10-006]                         |                   |                   |                    |                   |
| <b>N1A—H1A<sup>ix</sup>⋯N23B<sup>ix</sup></b> | <b>0.91 (2)</b>   | <b>2.23 (2)</b>   | <b>3.090 (2)</b>   | <b>157 (2)</b>    |
| <b>N1B—H1B<sup>x</sup>⋯N23A<sup>x</sup></b>   | <b>0.89 (2)</b>   | <b>2.22 (2)</b>   | <b>3.078 (2)</b>   | <b>160.7 (19)</b> |
| <i>C12A—H12A⋯O1A</i>                          | 0.93              | 2.38              | 2.929 (2)          | 117               |
| <i>C12B—H12B⋯O1B</i>                          | 0.93              | 2.49              | 2.952 (2)          | 111               |
| <i>C14A—H14A⋯O1B<sup>ii</sup></i>             | 0.93              | 2.50              | 3.343 (2)          | 151               |
| <i>C14B—H14B⋯O1A<sup>xi</sup></i>             | 0.93              | 2.50              | 3.328 (2)          | 148               |
| <i>C22A—H22A⋯Cg1<sup>xii</sup></i>            | 0.93              | 2.82              | 3.555 (2)          | 137               |
| <i>C22B—H22B⋯Cg2<sup>xiii</sup></i>           | 0.93              | 2.76              | 3.512 (2)          | 138               |
| <b>NmoM</b> _[10-007]                         |                   |                   |                    |                   |
| <b>N1—H1<sup>xiv</sup>⋯O1<sup>xiv</sup></b>   | <b>0.855 (17)</b> | <b>2.055 (18)</b> | <b>2.8978 (15)</b> | <b>168.6 (15)</b> |
| <i>C17—H17B⋯O1</i>                            | 0.96              | 2.57              | 3.072 (2)          | 113               |
| <i>C26—H26⋯Cg1<sup>xv</sup></i>               | 0.93              | 2.72              | 3.5751 (16)        | 152               |
| <b>NopM</b> _[10-008]                         |                   |                   |                    |                   |
| <b>N1—H1<sup>xvi</sup>⋯N22</b>                | <b>0.903 (15)</b> | <b>2.160 (15)</b> | <b>2.6548 (18)</b> | <b>113.6 (11)</b> |
| <i>C12—H12⋯O1</i>                             | 0.93              | 2.46              | 2.9436 (18)        | 113               |

|                                     |                   |                   |                    |                   |
|-------------------------------------|-------------------|-------------------|--------------------|-------------------|
| C16—H16...O1 <sup>xvi</sup>         | 0.93              | 2.40              | 3.3111 (18)        | 168               |
| <b>NomM</b> _[10-009]               |                   |                   |                    |                   |
| <b>N1A—H1A...O1B<sup>xvii</sup></b> | <b>0.93 (2)</b>   | <b>2.41 (2)</b>   | <b>3.241 (3)</b>   | <b>148 (2)</b>    |
| <b>N1B—H1B...O1A</b>                | <b>0.87 (2)</b>   | <b>2.32 (2)</b>   | <b>3.132 (3)</b>   | <b>155 (2)</b>    |
| <b>N1A—H1A...N22A</b>               | <b>0.93 (2)</b>   | <b>2.18 (2)</b>   | <b>2.683 (4)</b>   | <b>112.9 (18)</b> |
| <b>N1B—H1B...N22B</b>               | <b>0.87 (2)</b>   | <b>2.28 (2)</b>   | <b>2.703 (4)</b>   | <b>109.5 (19)</b> |
| <i>C12A—H12A...O1A</i>              | <i>0.93</i>       | <i>2.29</i>       | <i>2.862 (4)</i>   | <i>120</i>        |
| C14B—H14B...Cg1 <sup>xviii</sup>    | 0.93              | 2.66              | 3.543 (4)          | 160               |
| <b>NooM</b> _[10-075]               |                   |                   |                    |                   |
| <b>N1—H1...N22</b>                  | <b>0.896 (14)</b> | <b>2.079 (13)</b> | <b>2.6209 (15)</b> | <b>118.0 (11)</b> |
| C16—H16...O1                        | 0.93              | 2.35              | 2.9524 (16)        | 122               |

Symmetry code(s): (i)  $x, y+1, z$ ; (ii)  $-x+1, -y, -z+1$ ; (iii)  $-x+1/2, y+1/2, -z+3/2$ ; (iv)  $x+1/2, -y+1/2, z+1/2$ ; (v)  $x, -y, z-1/2$ ; (vi)  $x+1/2, y-1/2, z$ ; (vii)  $-x, y-1/2, -z+1/2$ ; (viii)  $-x, -y, -z+1$ ; (ix)  $-x+1, -y, -z$ ; (x)  $-x, -y+1, -z$ ; (xi)  $x, -y+1, -z+1$ ; (xii)  $-x, -y, -z$ ; (xiii)  $-x+1, -y+1, -z+1$ ; (xiv)  $-x+1/2, y-1/2, z$ ; (xv)  $x, -y-3/2, z-1/2$ ; (xvi)  $x+1, y, z$ ; (xvii)  $-x, y+1/2, -z$ ; (xviii)  $-x+1, y-1/2, -z$ .

‡ **Additional Information for Tables 4 and 5 (pages 31-33 of the ESI):**

For the purposes of distinguishing the primary and secondary hydrogen bonding interactions in the nine NxxM isomer series described in Table 4 above, the **primary hydrogen bonding interactions** are labelled in **bold** for the two groups of (NpxM, NmxM) and (NoxM, 5-Cl\_NoxM) with the primary interactions coloured (**orange/green**) as used in Table 2 of the [main paper](#). The contacts are labeled in *italics* and these are predominantly intramolecular contacts.

Please also refer to the paper from the CSD group ‘Hydrogen-bond directionality at the donor H atom – analysis of interaction energies and database statistics’ by Peter A. Wood, Frank H. Allen and Elna Pidcock, *CrystEngComm*, 2009, **11**, 1563 for further details on hydrogen bonding and interaction energies.



4.4 Table 5. Selected hydrogen-bond and contact parameters for three 5-Cl-NxxM isomers and NmpFM<sup>#</sup>.

| <i>D</i> —H... <i>A</i>            | <i>D</i> —H (Å)   | H... <i>A</i> (Å) | <i>D</i> ... <i>A</i> (Å) | <i>D</i> —H... <i>A</i> (°) |
|------------------------------------|-------------------|-------------------|---------------------------|-----------------------------|
| <b>Cl_NopM</b> [10-024]            |                   |                   |                           |                             |
| <b>N1—H1...N22</b>                 | <b>0.915 (9)</b>  | <b>2.176 (9)</b>  | <b>2.6514 (9)</b>         | <b>111.5 (7)</b>            |
| <i>C12—H12...O1</i>                | 0.93              | 2.41              | 2.9453 (11)               | 116                         |
| <i>C23—H23...O1<sup>i</sup></i>    | 0.93              | 2.53              | 3.4223 (11)               | 161                         |
| <i>C17—H17A...Cg1<sup>ii</sup></i> | 0.96              | 2.82              | 3.6699 (12)               | 147                         |
| <b>Cl_NomM</b> [10-096]            |                   |                   |                           |                             |
| <b>N1—H1...N22</b>                 | <b>0.86 (5)</b>   | <b>2.27 (4)</b>   | <b>2.683 (4)</b>          | <b>109 (4)</b>              |
| <b>N1—H1...O1<sup>iii</sup></b>    | <b>0.86 (5)</b>   | <b>2.37 (5)</b>   | <b>3.035 (4)</b>          | <b>134 (4)</b>              |
| <i>C12—H12...O1</i>                | 0.93              | 2.37              | 2.964 (5)                 | 121.2                       |
| <b>Cl_NooM</b> [10-012]            |                   |                   |                           |                             |
| <b>N1—H1...N22</b>                 | <b>0.860 (15)</b> | <b>2.175 (15)</b> | <b>2.6690 (15)</b>        | <b>116.3 (12)</b>           |
| <i>C16—H16...O1</i>                | 0.93              | 2.30              | 2.9128 (19)               | 123                         |
| <i>C26—H26...Cl1<sup>iv</sup></i>  | 0.93              | 2.83              | 3.7371 (14)               | 165                         |
| <b>NmpFM</b> [10-086] <sup>#</sup> |                   |                   |                           |                             |
| <b>N1—H1...N23<sup>v</sup></b>     | <b>0.92 (3)</b>   | <b>2.34 (2)</b>   | <b>3.207 (2)</b>          | <b>157 (3)</b>              |
| <i>C16—H16...N23<sup>v</sup></i>   | 0.93              | 2.62              | 3.438 (3)                 | 147                         |
| <i>C22—H22...N23<sup>v</sup></i>   | 0.93              | 2.41              | 3.337 (3)                 | 178                         |
| <i>C12—H12...O1</i>                | 0.93              | 2.24              | 2.835 (4)                 | 122                         |
| <i>C26—H26...O1<sup>i</sup></i>    | 0.93              | 2.58              | 3.194 (2)                 | 124                         |
| <i>C24—H24...F14<sup>vi</sup></i>  | 0.93              | 2.93              | 3.677 (11)                | 139                         |

Symmetry code(s): (i)  $-x, -y, z+1/2$ ; (ii)  $x+1/2, -y+1, z$ ; (iii)  $x, -y+3/2, z-1/2$ ; (iv)  $-x+1/2, y+1/2, -z+1/2$ ; (v)  $x, -y+1, z-1/2$ ; (vi)  $x-1/2, -y+1/2, z+2$ .

#### NmpFM refinement<sup>#</sup>

Refinement with F only (with free variable) gives  $R = 0.042$ , F14 occupancy of 0.77(1), WGHT = 0.075.

Refinement as CH<sub>3</sub> only (with free variable) gives  $R = 0.042$ , CH<sub>3</sub> occupancy of 1.20(1), WGHT = 0.071.

Both refinements give poorer results for the overall refinement process [CH<sub>3</sub> with AFIX 137].

The final refinement gives  $R = 0.035$  with 50% F and 50% CH<sub>3</sub> occupancy.

**5. *Ab initio* calculation results****5.1. Energy results****5.1.1. Table 6.** Optimisations in *gas phase*

|             | $E_{\text{SCF}}$ | $\delta E_{\text{SCF}}$ | $E_0$     | $\delta E_0$ | E         | $\delta E$ | G         | $\delta G$ |
|-------------|------------------|-------------------------|-----------|--------------|-----------|------------|-----------|------------|
| <b>NppM</b> | -683.2662        | -4.38                   | -686.1620 | 0.00         | -686.1490 | -1.64      | -686.2031 | 0.00       |
| <b>NpmM</b> | -683.2670        | -6.63                   | -686.1623 | -0.76        | -686.1484 | 0.00       | -686.2063 | -8.38      |
| <b>NpoM</b> | -683.2645        | 0.00                    | -686.1623 | -0.68        | -686.1487 | -0.91      | -686.2039 | -2.09      |
| <b>NmpM</b> | -683.2683        | -10.03                  | -686.1627 | -1.84        | -686.1488 | -1.16      | -686.2057 | -6.64      |
| <b>NmmM</b> | -683.2692        | -12.36                  | -686.1630 | -2.54        | -686.1491 | -1.88      | -686.2061 | -7.78      |
| <b>NmoM</b> | -683.2667        | -5.78                   | -686.1631 | -2.77        | -686.1495 | -2.98      | -686.2047 | -4.23      |
| <b>NopM</b> | -683.2774        | -33.97                  | -686.1728 | -28.26       | -686.1600 | -30.34     | -686.2134 | -27.00     |
| <b>NomM</b> | -683.2783        | -36.31                  | -686.1730 | -28.98       | -686.1603 | -31.17     | -686.2135 | -27.31     |
| <b>NooM</b> | -683.2761        | -30.37                  | -686.1733 | -29.66       | -686.1599 | -30.27     | -686.2145 | -29.93     |

**5.1.2. Table 7.** Optimisations in  $\text{CH}_2\text{Cl}_2$ 

|             | $E_{\text{SCF}}$ | $\delta E_{\text{SCF}}$ | $E_0$      | $\delta E_0$ | E         | $\delta E$ | G         | $\delta G$ |
|-------------|------------------|-------------------------|------------|--------------|-----------|------------|-----------|------------|
| <b>NppM</b> | -683.2936        | -5.63                   | -686.18678 | 0.00         | -686.1731 | 0.00       | -686.2288 | -0.69      |
| <b>NpmM</b> | -683.2944        | -7.63                   | -686.18692 | -0.38        | -686.1733 | -0.43      | -686.2289 | -0.94      |
| <b>NpoM</b> | -683.2915        | 0.00                    | -686.18703 | -0.67        | -686.1736 | -1.26      | -686.2285 | 0.00       |
| <b>NmpM</b> | -683.2957        | -10.99                  | -686.18704 | -0.70        | -686.1734 | -0.68      | -686.2291 | -1.57      |
| <b>NmmM</b> | -683.2965        | -13.16                  | -686.18726 | -1.28        | -686.1736 | -1.28      | -686.2293 | -2.11      |
| <b>NmoM</b> | -683.2937        | -5.71                   | -686.18736 | -1.53        | -686.1739 | -2.02      | -686.2292 | -1.69      |
| <b>NopM</b> | -683.3010        | -24.99                  | -686.19443 | -20.09       | -686.1816 | -22.32     | -686.2350 | -16.98     |
| <b>NomM</b> | -683.3018        | -26.99                  | -686.19439 | -19.99       | -686.1808 | -20.22     | -686.2362 | -20.21     |
| <b>NooM</b> | -683.2994        | -20.73                  | -686.19450 | -20.28       | -686.1813 | -21.38     | -686.2351 | -17.29     |

**5.1.3. Table 8.** Optimisations in  $\text{H}_2\text{O}$ 

|             | $E_{\text{SCF}}$ | $\delta E_{\text{SCF}}$ | $E_0$      | $\delta E_0$ | E         | $\delta E$ | G         | $\delta G$ |
|-------------|------------------|-------------------------|------------|--------------|-----------|------------|-----------|------------|
| <b>NppM</b> | -683.2873        | -1.54                   | -686.17900 | -0.30        | -686.1653 | -0.33      | -686.2212 | -1.83      |
| <b>NpmM</b> | -683.2879        | -3.33                   | -686.17889 | 0.00         | -686.1652 | 0.00       | -686.2212 | -1.85      |
| <b>NpoM</b> | -683.2867        | 0.00                    | -686.17960 | -1.85        | -686.1663 | -2.77      | -686.2205 | 0.00       |
| <b>NmpM</b> | -683.2897        | -7.84                   | -686.17927 | -1.00        | -686.1656 | -0.96      | -686.2216 | -2.81      |
| <b>NmmM</b> | -683.2904        | -9.69                   | -686.17916 | -0.71        | -686.1655 | -0.80      | -686.2212 | -1.74      |
| <b>NmoM</b> | -683.2892        | -6.60                   | -686.17994 | -2.75        | -686.1666 | -3.56      | -686.2210 | -1.16      |
| <b>NopM</b> | -683.2922        | -14.44                  | -686.18423 | -14.02       | -686.1722 | -18.27     | -686.2237 | -8.28      |
| <b>NomM</b> | -683.2930        | -16.64                  | -686.18404 | -13.51       | -686.1704 | -13.66     | -686.2263 | -15.08     |
| <b>NooM</b> | -683.2904        | -9.81                   | -686.18415 | -13.82       | -686.1717 | -16.96     | -686.2237 | -8.31      |

The tables present absolute values of electronic ( $E_{\text{SCF}}$ ), zero point ( $E_0$ ), energy (E) and Gibbs free energy (G) for the nine **NxxM** isomers expressed in Hartrees ( $E_h$ ). The relative energies (**NppM**, **NpmM** or **NpoM** is taken as basis point) are shown in columns with suffix  $\delta$ , and are expressed in  $\text{kJ}\cdot\text{mol}^{-1}$ .

5.1.4. Table 9. Comparison of energies in different media

|             | <i>gas phase</i> →CH <sub>2</sub> CH <sub>2</sub> |                 |        |                    | <i>gas phase</i> →H <sub>2</sub> O |                 |        |                    | CH <sub>2</sub> Cl <sub>2</sub> →H <sub>2</sub> O |                  |        |                     | logK <sub>D/W</sub> |
|-------------|---------------------------------------------------|-----------------|--------|--------------------|------------------------------------|-----------------|--------|--------------------|---------------------------------------------------|------------------|--------|---------------------|---------------------|
|             | ΔE <sub>SCF</sub>                                 | ΔE <sub>0</sub> | ΔE     | ΔG <sub>solv</sub> | ΔE <sub>SCF</sub>                  | ΔE <sub>0</sub> | ΔE     | ΔG <sub>solv</sub> | ΔΔE <sub>SCF</sub>                                | ΔΔE <sub>0</sub> | ΔΔE    | ΔΔG <sub>solv</sub> |                     |
| <b>NppM</b> | -72.09                                            | -65.04          | -63.25 | -67.33             | -55.38                             | -44.63          | -42.82 | -47.53             | -16.71                                            | -20.41           | -20.42 | -19.80              | 3.47                |
| <b>NpmM</b> | -71.84                                            | -64.65          | -65.32 | -59.21             | -54.93                             | -43.58          | -44.13 | -39.17             | -16.92                                            | -21.08           | -21.19 | -20.04              | 3.51                |
| <b>NpoM</b> | -70.84                                            | -65.03          | -65.24 | -64.55             | -58.22                             | -45.51          | -45.99 | -43.61             | -12.62                                            | -19.52           | -19.24 | -20.94              | 3.67                |
| <b>NmpM</b> | -71.81                                            | -63.90          | -64.40 | -61.58             | -56.03                             | -43.50          | -43.94 | -41.87             | -15.77                                            | -20.40           | -20.47 | -19.70              | 3.45                |
| <b>NmmM</b> | -71.64                                            | -63.78          | -64.28 | -60.98             | -55.55                             | -42.51          | -43.05 | -39.66             | -16.09                                            | -21.27           | -21.24 | -21.32              | 3.73                |
| <b>NmoM</b> | -70.78                                            | -63.80          | -63.93 | -64.10             | -59.04                             | -44.32          | -44.72 | -42.64             | -11.73                                            | -19.48           | -19.21 | -21.47              | 3.76                |
| <b>NopM</b> | -61.86                                            | -56.86          | -56.87 | -56.62             | -38.69                             | -30.10          | -32.07 | -26.98             | -23.17                                            | -26.77           | -24.80 | -29.64              | 5.19                |
| <b>NomM</b> | -61.52                                            | -56.05          | -53.94 | -59.54             | -38.55                             | -28.87          | -26.63 | -33.48             | -22.97                                            | -27.18           | -27.32 | -26.06              | 4.56                |
| <b>NooM</b> | -61.21                                            | -55.66          | -55.99 | -54.00             | -37.67                             | -28.49          | -30.82 | -24.08             | -23.54                                            | -27.17           | -25.17 | -29.92              | 5.24                |

**Comment on energy calculations:**

The least stable molecules are **NppM** and **NpoM**, while the most stable, regardless of media is **NomM**. The **NoxM** molecules due to their inherent stabilisation through intramolecular N-H...N<sub>pyr</sub> hydrogen bonding are the most stable, with significant differences as compared to the other six **NpxM/NmxM** isomers. Another stabilisation factor is the methyl group located in a *meta* position, although this effect is less pronounced. In total, the effects of the pyridine **N** atom and CH<sub>3</sub> group positions on stability is summarised as: **No**>**Nm**>**Np** with **mM**>**pM**>**oM**. The estimated ΔG<sub>solv</sub> in CH<sub>2</sub>Cl<sub>2</sub> and H<sub>2</sub>O, along with theoretical logK<sub>D/W</sub> are consistent with our experimental observations and with no unexpected results. All compounds should be 10<sup>3</sup>-10<sup>4</sup> times more soluble in CH<sub>2</sub>Cl<sub>2</sub> than in H<sub>2</sub>O; the **NoxM** series are expected to be the least soluble in water.

The **Table 9** above shows differences (Δ) of the energies (E<sub>SCF</sub>, E<sub>0</sub>, E and G) for the nine **NxxM** isomers in different media expressed in kJ.mol<sup>-1</sup>. The ΔG<sub>solv</sub> represents the calculated energy of solvation, while ΔΔG<sub>solv</sub> represents the difference of energies of solvation in two different solvents (CH<sub>2</sub>Cl<sub>2</sub> and H<sub>2</sub>O). The final variable, logK<sub>D/W</sub> presents the tentative (theoretical) values of the partition coefficient of the **NxxM** molecules between dichloromethane (CH<sub>2</sub>Cl<sub>2</sub>, DCM) and water (H<sub>2</sub>O), calculated as logK<sub>D/W</sub> = -ΔΔG<sub>solv</sub>/2.303RT. This model has not been validated using the exact experimental values of logK<sub>D/W</sub>, therefore, it has exclusively relative (qualitative) not absolute (quantitative) significance and the tentative values of logK<sub>D/W</sub> should not be taken as final.

5.2. Potential energy surface (PES) scans of the nine NxxM conformers (rotamers), optimised in gas phase

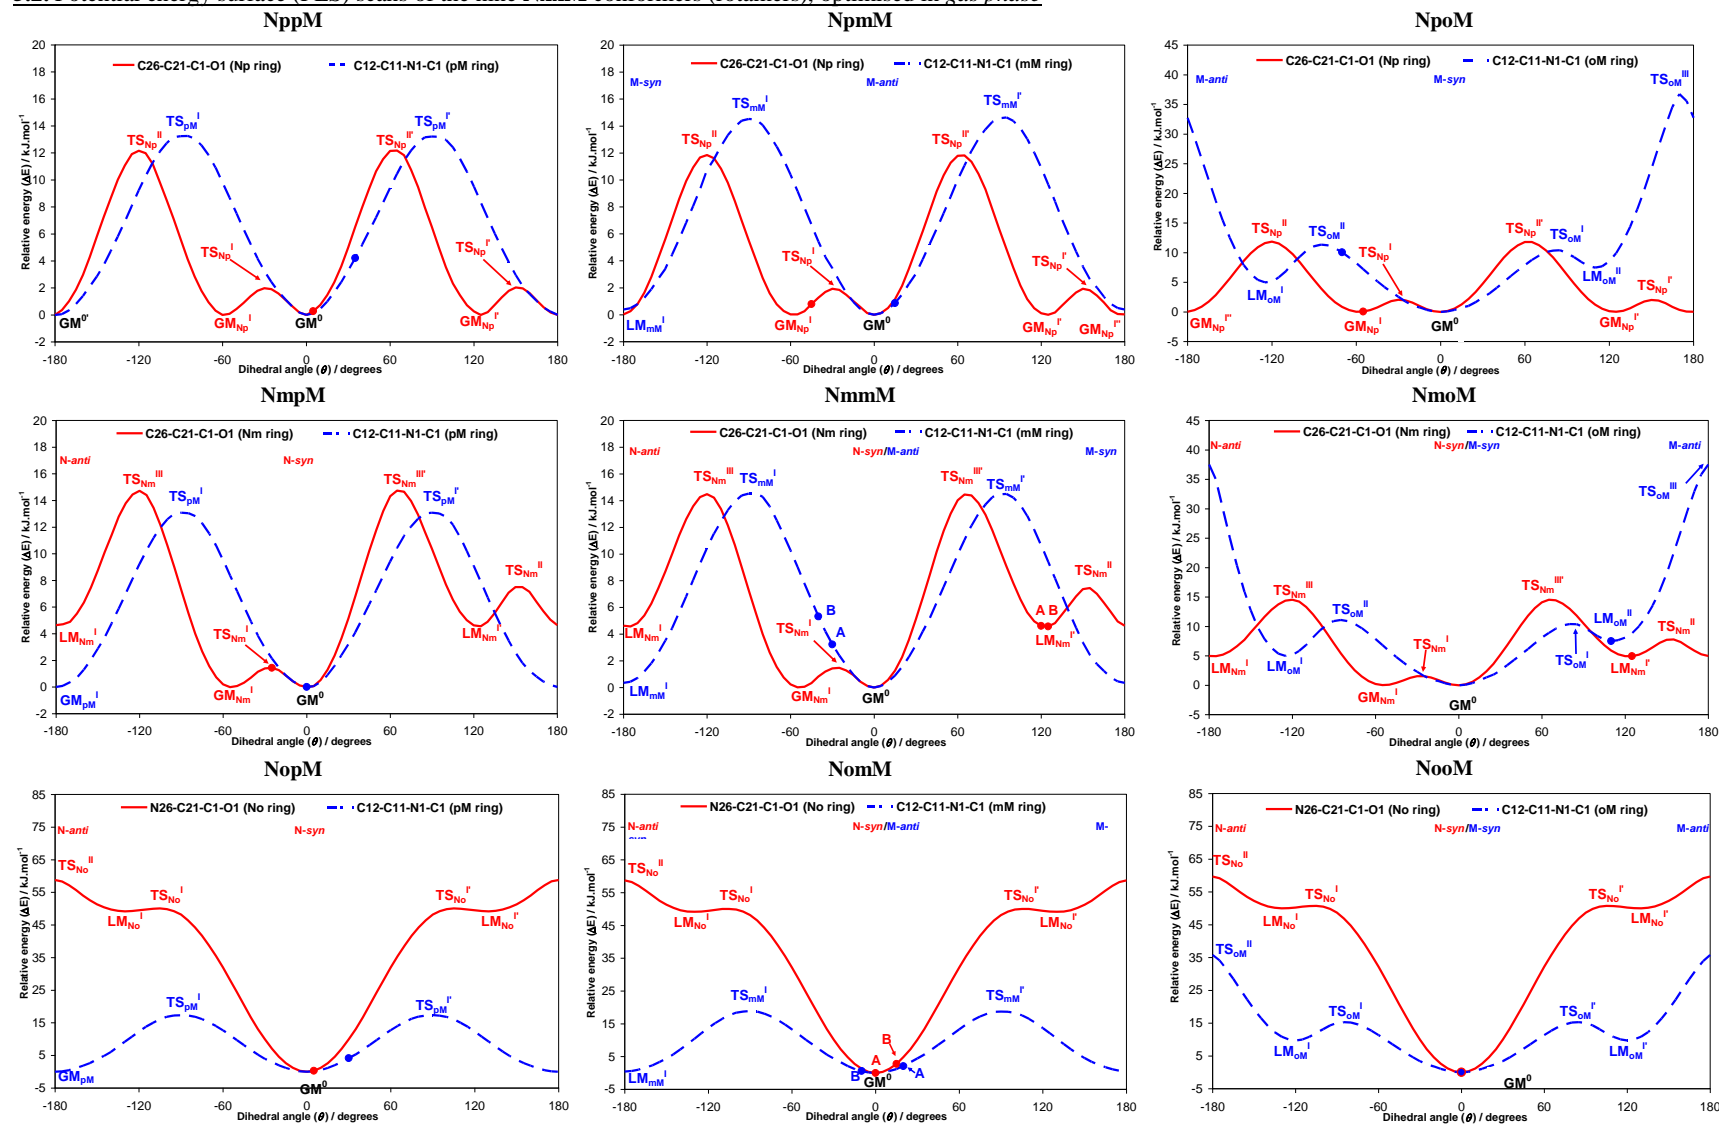

**Detailed description:**

The *para*-pyridine (Np) ring has a PES curve with two global maxima at *ca.* 65° and -120° ( $TS_{Np}^{II} = 11.94 \pm 0.18 \text{ kJ.mol}^{-1}$ ), two local maxima at around -30° and 150° ( $TS_{Np}^I = 1.98 \pm 0.05 \text{ kJ.mol}^{-1}$ ) and four global minima at *ca.* 0, -55, 125 and  $\pm 180^\circ$ .

The *meta*-pyridine (Nm) ring has two global maxima at *ca.* -120° and 65°, ( $TS_{Nm}^{III} = 14.57 \pm 0.12 \text{ kJ.mol}^{-1}$ ), two local maxima at *ca.* -25° ( $TS_{Nm}^I = 1.48 \pm 0.05 \text{ kJ.mol}^{-1}$ ) and 150° ( $TS_{Nm}^{II} = 7.57 \pm 0.17 \text{ kJ.mol}^{-1}$ ), two local minima at *ca.* 125° and  $\pm 180^\circ$  ( $LM_{Nm}^I = 4.70 \pm 0.17 \text{ kJ.mol}^{-1}$ ) and two global minima at 0° and -55°.

The *ortho*-pyridine (No) ring shows a symmetric PES curve with one global maximum at  $\pm 180^\circ$  ( $TS_{No}^{II} = 59.07 \pm 0.53 \text{ kJ.mol}^{-1}$ ), two local maxima at  $\pm 105^\circ$  ( $TS_{No}^I = 50.28 \pm 0.34 \text{ kJ.mol}^{-1}$ ), two local minima at *ca.*  $\pm 130^\circ$  ( $LM_{No}^I = 49.44 \pm 0.41 \text{ kJ.mol}^{-1}$ ) and one global minimum at 0°. The *para*-tolyl (**pM**) gives a symmetric PES curve with two global maxima at *ca.*  $\pm 90^\circ$  ( $TS_{pM}^I = 13.15 \pm 0.09 \text{ kJ.mol}^{-1}$ , while  $TS_{pM}^I[\text{NopM}] = 17.33 \text{ kJ.mol}^{-1}$ ), and two global minima at 0° and  $\pm 180^\circ$ .

The *meta*-tolyl (mM) has a symmetric PES curve with two global maxima at *ca.*  $\pm 90^\circ$  ( $TS_{mM}^I = 14.54 \pm 0.06 \text{ kJ.mol}^{-1}$ , while  $TS_{mM}^I[\text{NomM}] = 18.79 \pm 0.11 \text{ kJ.mol}^{-1}$ ), one local minima at *ca.*  $\pm 180^\circ$  ( $LM_{mM}^I = 0.37 \pm 0.02 \text{ kJ.mol}^{-1}$ , while  $LM_{mM}^I[\text{NomM}] = 0.46 \text{ kJ.mol}^{-1}$ ) and one global minima at 0°.

The *ortho*-tolyl (oM) ring: The PES in **NpoM** has one global maximum at 170°, while in **NmoM** it is at  $\pm 180^\circ$  ( $TS_{oM}^{III} = 37.13 \pm 0.53 \text{ kJ.mol}^{-1}$ ). The PES curve has two local maxima at *ca.* 85° ( $TS_{oM}^I = 10.39 \pm 0.01 \text{ kJ.mol}^{-1}$ ) and -85° ( $TS_{oM}^{II} = 11.21 \pm 0.19 \text{ kJ.mol}^{-1}$ ), two local minima at *ca.* -125° ( $LM_{oM}^I = 4.97 \text{ kJ.mol}^{-1}$ ) and 110° ( $LM_{oM}^{II} = 7.47 \pm 0.03 \text{ kJ.mol}^{-1}$ ), and one global minimum (0°). The symmetric PES curve of the oM ring in **NooM** has one global maximum at  $\pm 180^\circ$  ( $TS_{oM}^{II}[\text{NooM}] = 35.73 \text{ kJ.mol}^{-1}$ ), two local maxima at  $\pm 85^\circ$  ( $TS_{oM}^I[\text{NooM}] = 15.31 \text{ kJ.mol}^{-1}$ ), two local minima at  $\pm 120^\circ$  ( $LM_{oM}^I[\text{NooM}] = 9.73 \text{ kJ.mol}^{-1}$ ) and the global minimum at 0°.

**5.3.** PES scans of the nine NxxM conformers (rotamers), optimised in *gas phase* (full line), CH<sub>2</sub>Cl<sub>2</sub> (dashed line) and in H<sub>2</sub>O (dotted line).

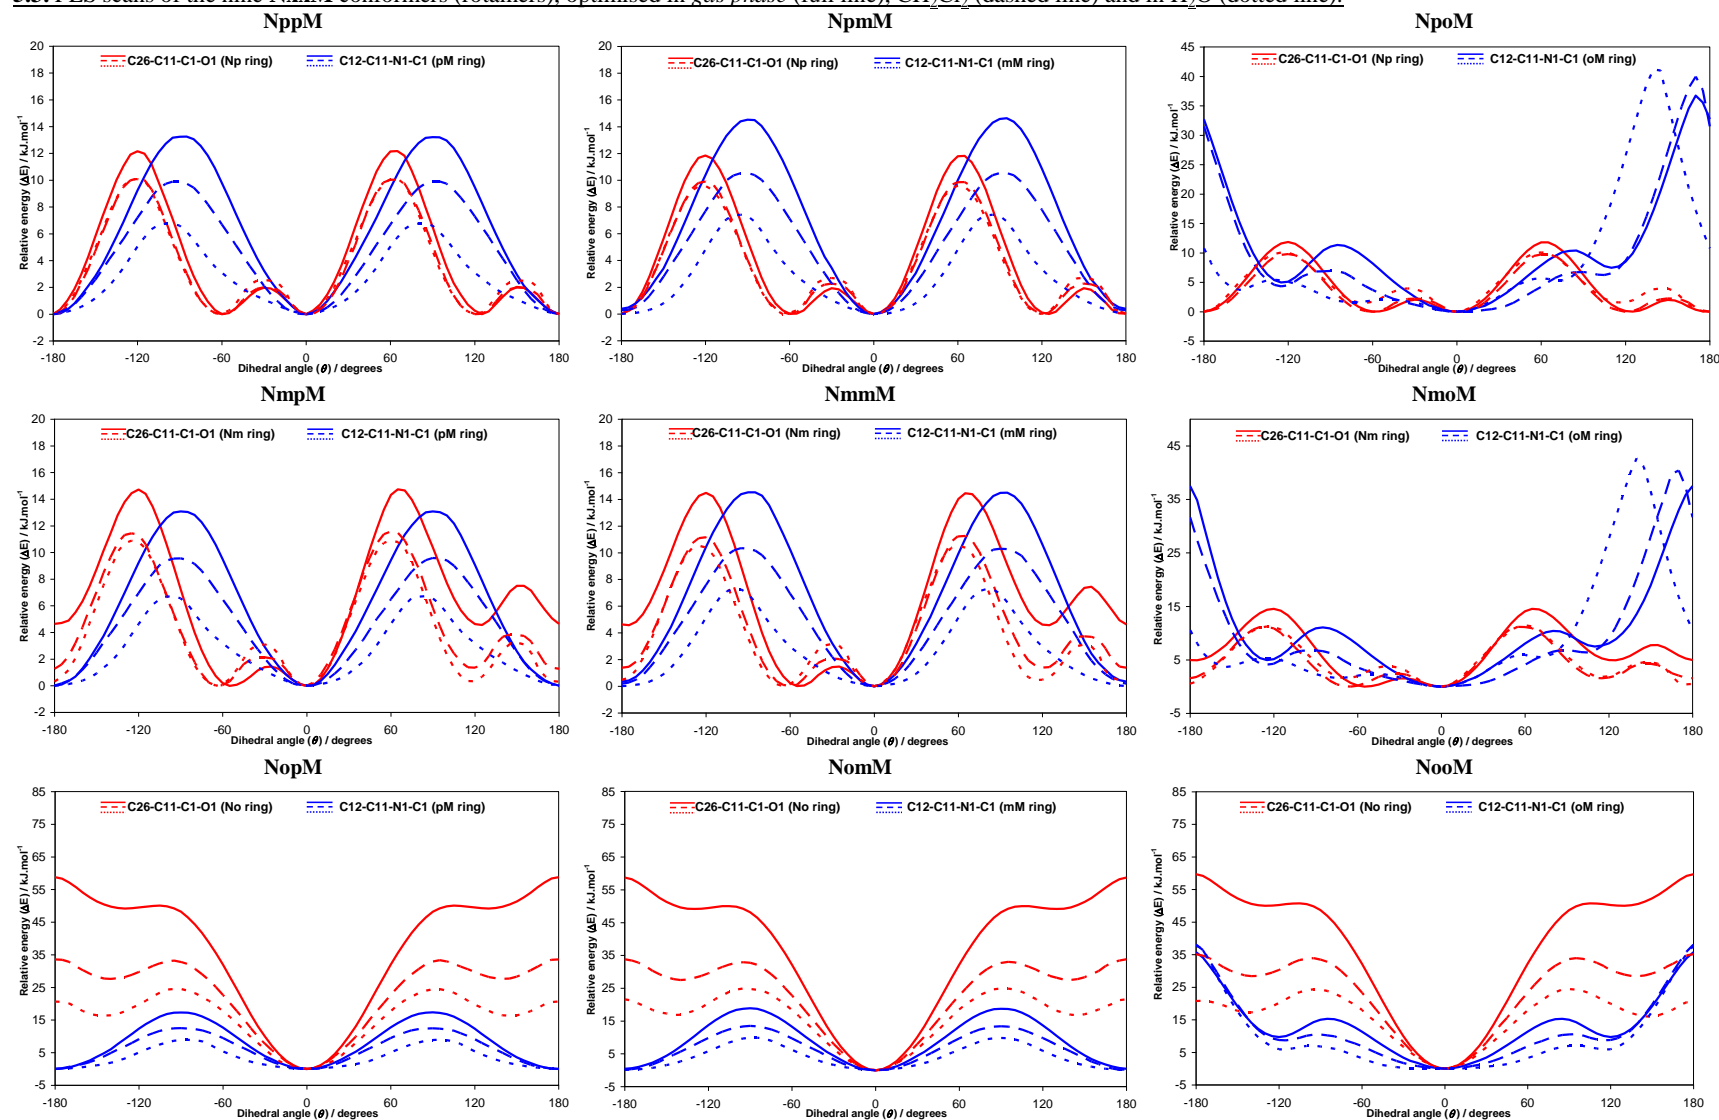

### **Detailed description:**

When the *para*-pyridine (**Np**) ring rotates towards orthogonality (around  $TS_{Np}^{II}$ ) the rotational barriers decrease by ~16.5% in  $CH_2Cl_2$  (~17.2% in  $H_2O$ ), whereas, in the areas of planarity (around  $TS_{Np}^I$ ) the rotational barriers increase in  $CH_2Cl_2$  by ~15% (~50% in  $H_2O$ ). The decrease in when orthogonal is almost the same in both solvents, while when planar the more polar solvent has the higher impact on the barrier increase. The reason for the increase is augmentation of repulsion due to the higher dielectric field.

The *meta*-pyridine (**Nm**) ring has a specific rotational barrier change pattern. In the **N-syn** conformation (from  $\theta = -120^\circ \rightarrow 60^\circ$ ) the **Nm** ring is similar to the **Np** ring with the decrease with orthogonal rings of ~22.4% in  $CH_2Cl_2$  (~25% in  $H_2O$ ) and an increase when the rings are co-planar is ~54.1% in  $CH_2Cl_2$  (~133.6% in  $H_2O$ ). In the **N-anti** conformation a linear decrease by ~3.35  $kJ \cdot mol^{-1}$  in  $CH_2Cl_2$  (~3.87  $kJ \cdot mol^{-1}$  in  $H_2O$ ) is observed. A noticeable shift of barriers ( $\Delta\theta \sim 5-10^\circ$ ) occurs due to the deviation of dihedral angles in solvents.

The rotational barrier for the *ortho*-pyridine (**No**) ring symmetrically decreases by ~41.7% ( $CH_2Cl_2$ ) and ~63.2% ( $H_2O$ ). Therefore, the solvent effect on the rotational barrier of the **No** ring is the most distinct, albeit as expected: the PCM-SMD model predicts the interaction of a strong solvent electric field with the intramolecular N-H...N hydrogen bond in the three **NoxM** and weakening the interaction.

The *para*-tolyl (**pM**) ring shows a regular decrease by ~27% in  $CH_2Cl_2$  (~49% in  $H_2O$ ). In **NopM** all of the barrier peaks are symmetrical, but in **NppM** and **NmpM** the peaks are shifted by ~5° in  $CH_2Cl_2$  (~10° in  $H_2O$ ). In the *meta*-tolyl (**mM**) ring the pattern is similar to the **pM** ring with decreases of ~28.5% in  $CH_2Cl_2$  (~49% in  $H_2O$ ), similar barrier shifts are noted as for the **pM** ring. The energy difference between **M-anti** and **M-syn** in  $CH_2Cl_2$  decreases by ~43%, while in  $H_2O$  the difference is almost cancelled (93%), making both conformations energetically equal. Theoretically, this observation implies that the **mM** ring in polar solvents can adopt both **M-anti** and **M-syn** conformations equivalently. The *ortho*-tolyl (**oM**) ring behaviour is more complex with the **NpoM/NmoM** isomers showing differences to **NooM**. The rotational barriers in the **M-syn** conformation decrease by ~37% ( $CH_2Cl_2$ ) and in the **M-anti** conformation increase by ~8% in  $CH_2Cl_2$  (~13% in  $H_2O$ ). However, due to a strong additional rotation of the **oM** rings optimised in  $H_2O$  the PES curve shape exhibits significant deviations. An extra local maximum is positioned at  $-45^\circ$  only and  $TS_{oM}^{III}$  is displaced (by  $\Delta\theta = 40^\circ$ ). For the symmetrical **NooM** the pattern is much simpler: as **M-syn** the conformation barrier decrease is ~31% in  $CH_2Cl_2$  (~54% in  $H_2O$ ) and in **M-anti** the increase is 6.7% in  $CH_2Cl_2$  (5.6% in  $H_2O$ ) because solvent induced high dielectric field can amplify repulsion of methyl group and carbonyl oxygen.
